---

# Switch-like and persistent memory formation in individual larval *Drosophila*

Amanda Lesar<sup>1</sup>, Javan Tahir<sup>1</sup>, Jason Wolk<sup>1</sup>, Marc Gershow<sup>1,2,3,\*</sup>

<sup>1</sup>Department of Physics, <sup>2</sup>Center for Neural Science, <sup>3</sup>Neuroscience Institute, New York University, New York, USA  
\*correspondence to [marc.gershow@nyu.edu](mailto:marc.gershow@nyu.edu)

---

Associative learning allows animals to use past experience to predict future events. The circuits underlying memory formation support immediate and sustained changes in function, often in response to a single example. Larval *Drosophila* is a genetic model for memory formation that can be accessed at the molecular, synaptic, cellular, and circuit levels, often simultaneously, but the standard behavioral assay for learning and memory does not address individual animals. It has also been difficult to form long lasting memories, especially those requiring synaptic reorganization. We demonstrate a new assay for learning and memory capable of tracking the changing preferences of individual larvae. We use this assay to explore how activation of a pair of reward neurons changes the response to the innately aversive gas Carbon Dioxide, CO<sub>2</sub>. We confirm that when coupled to odor presentation in appropriate temporal sequence, optogenetic reward reduces avoidance of CO<sub>2</sub>. We find that learning is quantized, all-or-nothing, and can be extinguished by repeated unrewarded exposure to CO<sub>2</sub>. We find that memories can be stabilized against extinction by repeated training or overnight consolidation. Finally, we demonstrate long-lasting protein synthesis dependent and independent memory formation.

## Introduction

Associative learning allows animals to use past experience to predict important future events, such as the appearance of food or predators, or changes in their environmental conditions [1, 2]. *Drosophila* is a favorable model system for the study of learning and memory formation [3–9], with approximately 10,000 neurons in its representative insect brain. Widely available experimental tools allow manipulation of gene expression and introduction of foreign transgenes in labeled neurons throughout the *Drosophila* brain, including in the learning and memory centers [9–12], whose synaptic connectivities can be reconstructed via an existing electron microscopy data set [10, 13, 14].

Larvae carry out complex behaviors including sensory-guided navigation [15–25], which can be modified by learning [3, 4, 6, 8]. Larval *Drosophila* has long been a model for the study of memory formation, with a well-established paradigm developed to study associative memory formation through classical conditioning [3, 4, 6–9, 26–28]. In this paradigm, larvae are trained and tested in groups, and learning is quantified by the difference in the olfactory preferences of differently trained groups of larvae. These assays quantify the effects of learning on a population level, but it is impossible to identify whether or to what extent an individual larva has learned.

New methods allow direct measurement of neural activity in behaving larvae [29, 30] and reconstruc-

tion of the connections between the neurons in a larva's brain [10, 13, 14, 31, 32], potentially allowing us to explore how learning changes the structure and function of this model nervous system. Using these tools requires us to identify larvae that have *definitively learned*. Further, to explore structural changes associated with learning, we need to form protein-synthesis dependent long-term memories.

Larvae trained to associate odor with electric shock form memories that persist for at least 8 hours [33]. Odor-salt memories have been shown to partially persist for at least 5 hours [34, 35] and can be protein-synthesis dependent [35], depending on the initial feeding state of the larva. Overnight memory retention, whether or not requiring protein-synthesis, has not been demonstrated in the larva, nor has long-lasting retention of appetitive memories.

In this work, we demonstrate a new apparatus for *in situ* training and measurement of olfactory preferences for individual larvae. We use this assay to quantify appetitive memories formed by presentation of carbon dioxide combined with optogenetic activation of reward neurons. Using this device, we find that larvae are sensitive to both the timing and context of the reward presentation, that learning is quantized and all-or-nothing, and that repeated presentation of odor without reinforcer can erase a newly formed memory. We induce memories that persist overnight, and control whether these memories require protein synthesis through alteration of the training protocol.

## Results

### A Y-maze assay to characterize olfactory preferences of individual *Drosophila* larvae.

Establishing the degree to which an individual larva seeks out or avoids an odorant requires repeated measurements of that larva's response to the odor. We developed a Y-maze assay [36] to repeatedly test an individual's olfactory preference. The Y-mazes (Figure 1A) are constructed from agarose and feature channels slightly larger than the larvae, allowing them to crawl freely but only in a straight line [37, 38]. An individual larva travels down one channel and approaches the intersection with the other two branches of the maze. Here the larva is presented with odorized air in one branch and pure air in the other. The larva then chooses and enters one of the two branches. When the larva reaches the end of its chosen channel, a circular

chamber redirects it to return along the same channel to the intersection to make another choice. Custom computer vision software detects the motion of the larva while computer controlled valves manipulate the direction of airflow so that the larva is always presented with a fresh set of choices each time it approaches the intersection.

We first sought to determine the suitability of this assay for measuring innate behavior. *Drosophila* larvae avoid carbon dioxide (CO<sub>2</sub>) [20, 39–42] at all concentrations. We presented larvae with a choice between humidified air and humidified air containing CO<sub>2</sub> each time they approached the central junction. At the 18% concentration used throughout this work, larvae with functional CO<sub>2</sub> receptors chose the CO<sub>2</sub>-containing channel about 25% of the time. The probability of choosing the CO<sub>2</sub> containing channel decreased as CO<sub>2</sub> concentration in that channel increased (Figure 1E). Larvae lacking a functional CO<sub>2</sub> receptor were indifferent to the presence of CO<sub>2</sub> in the channel (Figure 1B), indicating that larvae responded to the presence of CO<sub>2</sub> and not some other property of the CO<sub>2</sub> containing air stream (e.g. an unknown contaminant, different humidity level, acidification of the substrate).

### Paired CO<sub>2</sub> presentation and optogenetic activation of a single pair of reward neurons eliminates CO<sub>2</sub> avoidance

Activation of the DAN-i1 pair of mushroom body input neurons has been shown to act as a reward for associative learning [9, 28, 43, 44]. In previous experiments, the conditioned odor was innately attractive. We wondered whether pairing DAN-i1 activation with CO<sub>2</sub> would lessen or even reverse the larva's innate avoidance of CO<sub>2</sub>.

To train larvae in the same Y-maze used to measure preference, we manipulated the valves so that the entire chamber was either filled with humidified air or with humidified air mixed with additional CO<sub>2</sub>. At the same time, we activated DAN-i1 neurons expressing CsChrimson using red LEDs built in to the apparatus. For some larvae, we activated DAN-i1 when CO<sub>2</sub> was present (paired, Figure 1D). For others, we activated the reward neurons when only air was present (reverse-paired, Figure 1D). Each training cycle consisted of one 15 second air presentation and one 15 second CO<sub>2</sub> presentation, with DAN-i1 activated for the entirety of the air (reverse-paired) or CO<sub>2</sub> (paired) presentation phase. For each larva, we first measured naive preference and then preference following training.

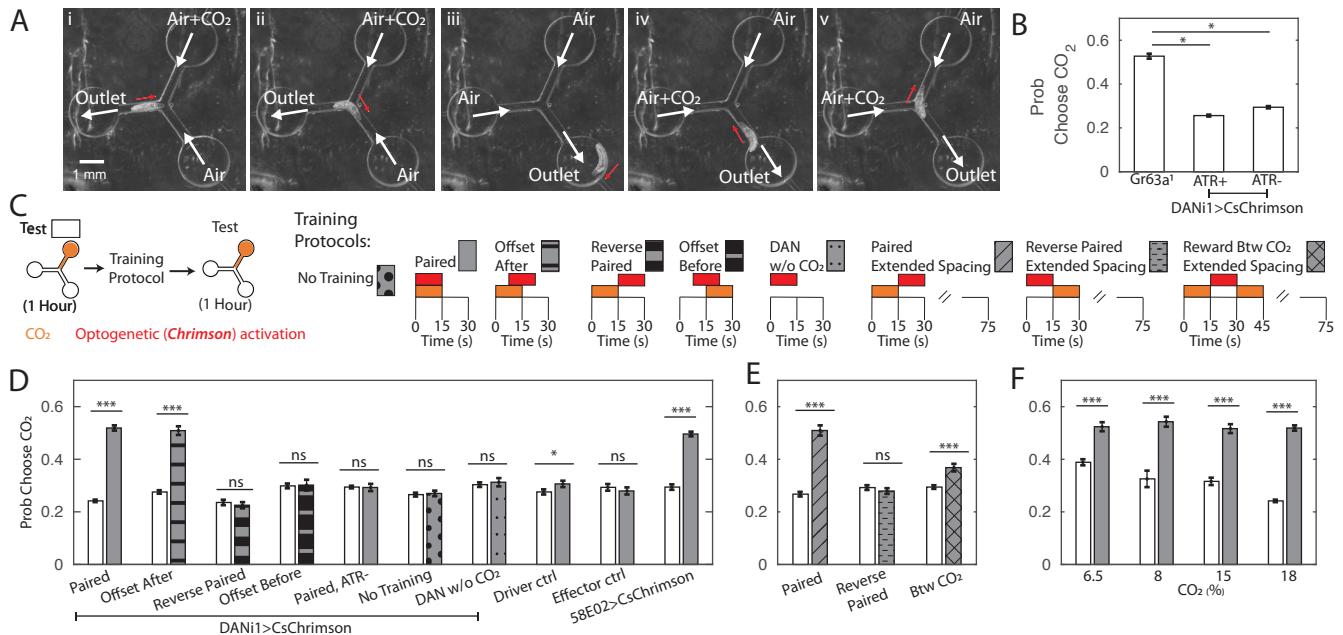

**Figure 1: Y-maze assay to quantify innate and learned preference.** (A) Image sequence of a larva making two consecutive decisions in the Y-maze assay. White arrows indicate direction of air flow; red arrow shows direction of larva's head. (B) Naive probability of choosing channel containing CO<sub>2</sub>. Gr63a<sup>1</sup> cannot perceive CO<sub>2</sub>. (C) Schematic representation of experiments in (D,E,F). All larvae are tested in the Y-maze for one hour to determine initial preference and again following manipulation to determine a final preference. The manipulations are: Paired Training - reward in concert with CO<sub>2</sub> presentation, 15s intervals, 20 repetitions; Offset After - reward presentation 7.5 s after CO<sub>2</sub> onset, 15s intervals, 20 repetitions; Reverse-Paired Training - reward opposite CO<sub>2</sub> presentation, 15s intervals, 20 repetitions; Offset Before - reward presentation 7.5 s before CO<sub>2</sub> onset, 15s intervals, 20 repetitions; DAN Activation Without CO<sub>2</sub> - CO<sub>2</sub> is never presented, while reward is presented at 15s intervals, 20 repetitions; no training - no manipulation between two testing periods; Paired (extended spacing) - 15s reward follows 15s CO<sub>2</sub> presentation, followed by 60 seconds of air, 20 repetitions; Reverse Paired (extended spacing) - 15s reward prior to 15s CO<sub>2</sub> presentation, followed by 60 seconds of air, 20 repetitions; Reward Between CO<sub>2</sub> (extended spacing) - 15s reward presentation between two 15s CO<sub>2</sub> presentations, followed by 45 seconds of air, 20 repetitions. (D) Probability of choosing CO<sub>2</sub> containing channel before and after manipulation. All animals were fed ATR supplemented food, except those marked ATR-. (E) Probability of choosing CO<sub>2</sub> containing channel before and after training as a function of reward timing, in training protocols with extended air spacings. All animals were DANI1>CsChrimson and fed ATR. (F) Probability of choosing CO<sub>2</sub> containing channel before and after 20 cycles of paired training, as a function of CO<sub>2</sub> concentration, used both during training and testing. All animals were DANI1>CsChrimson and fed ATR. \* rejects null hypothesis that distributions are the same; \* p<0.05, \*\* p<0.01, \*\*\* p<0.001.

We found that in the paired group, larvae became indifferent to CO<sub>2</sub> presentation following 20 training cycles (Figure 1D, DANI1>CsChrimson, Paired). We did not observe any change in preference in the reverse-paired group (DANI1>CsChrimson, Reverse-Paired). Nor did we observe a preference change following paired training for genetically identical animals not fed all-trans-retinal (ATR), a necessary co-factor for CsChrimson function (DANI1>CsChrimson, Paired ATR-). Animals fed ATR but not exposed to red light also failed to show a preference shift (DANI1>CsChrimson, No Training). Larvae of the parent strains fed ATR and given paired training also showed no preference shift

(Effector Control, Driver Control). To control for possible effects of DAN-i1 activation, we activated DAN-i1 in 15 second intervals without presenting CO<sub>2</sub> at all during the training (DANI1>CsChrimson, DAN w/o CO<sub>2</sub>); these larvae also showed no shift in preference.

Taken together these results show that the change in CO<sub>2</sub> preference requires activation of the DAN-i1 neurons and is not due to habituation, red light presentation, or other aspects of the training protocol. In particular, the paired and reverse-paired group experienced identical CO<sub>2</sub> presentations and DAN-i1 activations with the only difference the relative timing between CO<sub>2</sub> presentation and DAN-i1

activation.

Activation of DAN-i1 coincident with CO<sub>2</sub> presentation decreased larvae's subsequent avoidance of CO<sub>2</sub>. Formally, this admits two possibilities: the larva's preference for CO<sub>2</sub> increased because CO<sub>2</sub> was presented at the same time as the reward or because CO<sub>2</sub> predicted the reward. To test whether learning was contingent on coincidence or prediction, we carried out an additional set of experiments. As before, we first tested innate preference, then presented 20 alternating cycles of 15s of CO<sub>2</sub> followed by 15s of air. However, this time during the conditioning phase, we either activated DAN-i1 7.5 seconds *after* CO<sub>2</sub> onset, in which case CO<sub>2</sub> predicted DAN-i1 activation, or 7.5 seconds *before* CO<sub>2</sub> onset, in which case CO<sub>2</sub> predicted withdrawal of DAN-i1 activation.

In both cases DAN-i1 was activated in the presence of CO<sub>2</sub> for 7.5 s and in the presence of air alone for 7.5 s. If learning depended only on the coincidence between reward and CO<sub>2</sub> presentations, both should be equally effective at generating a change in preference. In fact, we only found an increase in CO<sub>2</sub> preference following training in which the CO<sub>2</sub> predicted the reward (Figure 1D).

Next we asked whether reward prediction alone was sufficient to establish a memory, or if coincidence between CO<sub>2</sub> and DAN-i1 activation was also required. We altered the training protocol to present 15 seconds of CO<sub>2</sub> followed by 60 seconds of air. Some larvae were rewarded by activation of DAN-i1 in the 15 seconds immediately following CO<sub>2</sub> presentation (paired), while others were rewarded in the 15 seconds immediately prior to CO<sub>2</sub> presentation (reverse paired). For a third group of larvae, CO<sub>2</sub> was presented both before and after reward presentation (reward between CO<sub>2</sub> presentations). At no time was DAN-i1 activated in the presence of CO<sub>2</sub>, but in the first group CO<sub>2</sub> predicted DAN-i1 activation while in the others it did not. We found an increased CO<sub>2</sub> preference for animals in this first group only (Figure 1E), indicating that reward prediction is both necessary and sufficient for learning in this assay.

In other associative conditioning experiments using DAN-i1 activation as a reward, decreased attraction to the odor was observed in the reverse-paired groups [9, 43, 44]. In our experiments, we did not see any evidence of increased aversion in the reverse-paired groups.

We wondered whether it might be possible to achieve an attraction to CO<sub>2</sub> following training, rather than 'merely' a loss of avoidance. In other contexts, reward via activation of 3 DANs (DAN-i1, DAN-h1, DAN-j1) labeled by the 58E02-Gal4

line has been reported to produce strong learning scores [9, 44–46]. We repeated the training protocol, substituting 58E02 activation for DAN-i1 activation alone, but did not see an increased preference following training compared to DAN-i1 activation alone (Figure 1D, 58E02>CsChrimson).

Next we asked how varying the CO<sub>2</sub> concentration might affect animals' performance in the assay. When the CO<sub>2</sub> concentration was substantially increased above 18%, a large fraction of larvae stopped crawling midway through the innate testing phase, perhaps to avoid taxing the respiratory system in the face of high intermittent CO<sub>2</sub> concentrations. This response was sensory-mediated (required Gr63a, data not shown) but also undesired, as our assay requires the larvae to continue moving in order to express an olfactory preference. We therefore concentrated on lower CO<sub>2</sub> concentrations. We presented lower concentrations of CO<sub>2</sub> both during the training and testing phases, and found that decreasing the CO<sub>2</sub> concentration decreased innate avoidance of CO<sub>2</sub>. In all cases, following training, larvae lost avoidance to CO<sub>2</sub> but none showed statistically significant attraction (Figure 1F).

## Learning is quantized and all-or-nothing

We investigated how change in preference to CO<sub>2</sub> following associative conditioning with DAN-i1 activation depended on the amount of training. As in the previous experiments, we first measured the innate preference, then trained the larva using repeated cycles alternating pure and CO<sub>2</sub> containing air, while activating DAN-i1 in concert with CO<sub>2</sub> presentation. In these experiments however, we varied the number of training cycles an individual larva experienced. We found that as a group, larvae that had experienced more training chose the CO<sub>2</sub> containing channel more often (Figure 2A).

Our data showed that increasing the amount of training increased overall preference for CO<sub>2</sub> up to a saturation point. But what was the mechanism for this change? Did each cycle of training increase each larva's preference for CO<sub>2</sub> by some small amount, with the effect accumulating over repeated training (graded learning)? Or did some larvae experience a dramatic preference change - from naive to fully trained - with each cycle of training, with the number of fully trained larvae increasing with training repetitions (quantized learning)?

Either quantized or graded learning can explain the shift of mean preference of a population; to differentiate between the modes of learning, we examined

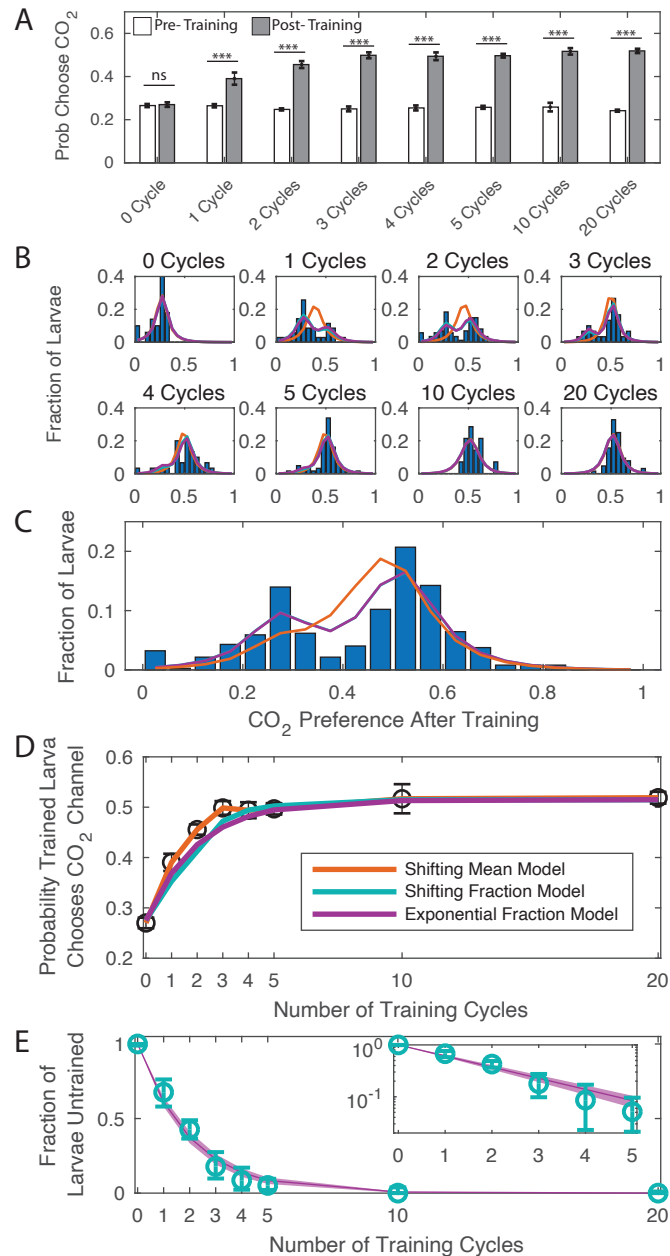

**Figure 2: Dose dependence of learning *DANi1>CsChrimson* were given varying cycles of paired training (as in Figure 1C). (A) Probability of choosing CO<sub>2</sub> containing channel before and after training, as a function of amount of training. \*\*\*  $p < 0.001$ . (B) Histograms of individual larva preference after training, grouped by number of training cycles. (C) Histogram of individual larva preference after training for all larvae. (D) Mean change in preference vs. dose. (E) Fraction of larvae untrained vs. number of training cycles. Teal: fit parameters and error ranges from quantized model, purple lines, prediction and error ranges from memoryless model. Note logarithmic y-axis on insert. (C-E) Orange: shifting mean model prediction - change in preference is represented by a single Gaussian distribution whose mean and variance depend on amount of training; Teal: shifting fraction model prediction - change in preference is represented by two fixed Gaussian distributions and the fraction of larvae in each population depends on the amount of training; Purple: exponential fraction model prediction - change in preference is represented by two fixed Gaussian distributions and the effect of a single training cycle is to train a fixed fraction of the remaining untrained larvae.**

repeated decisions made by individual animals, measurements that were impossible in previous larval assays. For each larva, we quantified the change in CO<sub>2</sub> preference before and after training. Figure 2B shows a histogram of larva preference (the fraction of times an individual larva chose the CO<sub>2</sub> containing

channel) after training, grouped by the number of cycles of training a larva received.

Larvae that received no training (0 cycles) formed a single population distributed about 0 net change in preference. Larvae that were trained to saturation (20 training cycles) also formed a single group centered around a change of 0.3. Both the graded and quantized learning models make the same predictions for these endpoints, but their predictions vary starkly for the intermediate cases. A graded learning model predicts that all larvae that received the same amount of training would form a single group whose mean preference for CO<sub>2</sub> would increase with increasing training. A quantized learning model predicts that larvae that have received the same amount of training will form two discrete groups ('trained' and 'untrained') with fixed centers whose means do not depend on the amount of training and that with increased training an increasing fraction of larvae will be found in the trained group.

We fit the distributions of preference following conditioning to graded and quantized learning models. In the graded model, the preference was represented by a single Gaussian distribution whose mean and variance were a function of amount of training (orange, Figure 2). In the quantized model, the preference was represented by two Gaussian distributions; the fraction of larvae in each population was a function of the amount of training (teal, Figure 2).

We found that the data were better described by the quantized learning model (Table S3): larvae form two discrete groups, with the fraction in the trained group increasing with each cycle of additional training. The centers of the two groups do not vary with the amount of training, a point made most clear by considering the preference after training of all larvae taken together regardless of the amount of training received (Figure 2C), which shows two well defined and separated groups. From these data, we concluded that the effect of our associative conditioning on an individual larva is to either cause a discrete switch in preference or to leave the initial preference intact.

Next we asked what effect, if any, associative conditioning had on larva that retained their innate preferences following training. For instance, would a larva that retained its initial preference following two cycles of training be 'primed to learn' - more likely to switch preferences following an additional cycle of training compared to a truly naive larva? Our fit to the quantized learning model produces an estimate of the fraction of larvae that remain untrained following training. If the training were *cumulative*, we

would expect a threshold effect: as the number of cycles of training increased from 0, most larvae would initially remain untrained until a critical number of cycles were reached and there would be a sudden shift to a mostly trained population. But when we plotted the fraction of untrained larvae vs. number of training cycles, we saw that the fraction of larvae in the untrained group exponentially decreased with increasing training (Figure 2E, note logarithmic y-axis on insert). Exponential decay is an indicator of a memoryless process - rather than accumulating over time, each training cycle either caused a larva to switch preference entirely or had no effect.

We confirmed this interpretation by fitting the population distributions to an all-or-nothing quantized learning model in which the effect of a single training cycle is to train a fixed fraction of the remaining untrained larvae (purple, Figure 2). This model fit the data better than the graded learning model and almost as well as the original quantized learning model, in which the fraction of untrained larvae was fit separately to each group, despite having fewer parameters than either model. According to standard selection rules (BIC and AIC), the all-or-nothing quantized model best describes the data (Table S3).

### **Repeated exposure without reward following training leads to memory extinction; overnight consolidation makes memories resistant to extinction**

Reversal learning, in which the reward contingency is reversed, and extinction, in which the conditioned stimulus is presented without reward, experiments explore cognitive flexibility. Previous experiments with both adult *Drosophila* [47–50] and larval [51] *Drosophila* demonstrated a reversal learning paradigm. Extinction [52–54] has been demonstrated in adult flies but not in larvae.

To test for extinction, we again first measured an individual larva's CO<sub>2</sub> preference and then carried out associative conditioning for a given number (2-10) of training cycles. Instead of immediately testing the larva's new preference for CO<sub>2</sub>, we next exposed the larva to an extinction phase - 18 cycles of alternating CO<sub>2</sub> and air without any optogenetic reward. Following the extinction period, larvae were tested as usual to measure their changed preference for CO<sub>2</sub>. As a control against the effects of increased CO<sub>2</sub> exposure, we also performed habituation experiments, which were the same as the extinction experiments, except the 18 unrewarded cycles were presented *prior* to

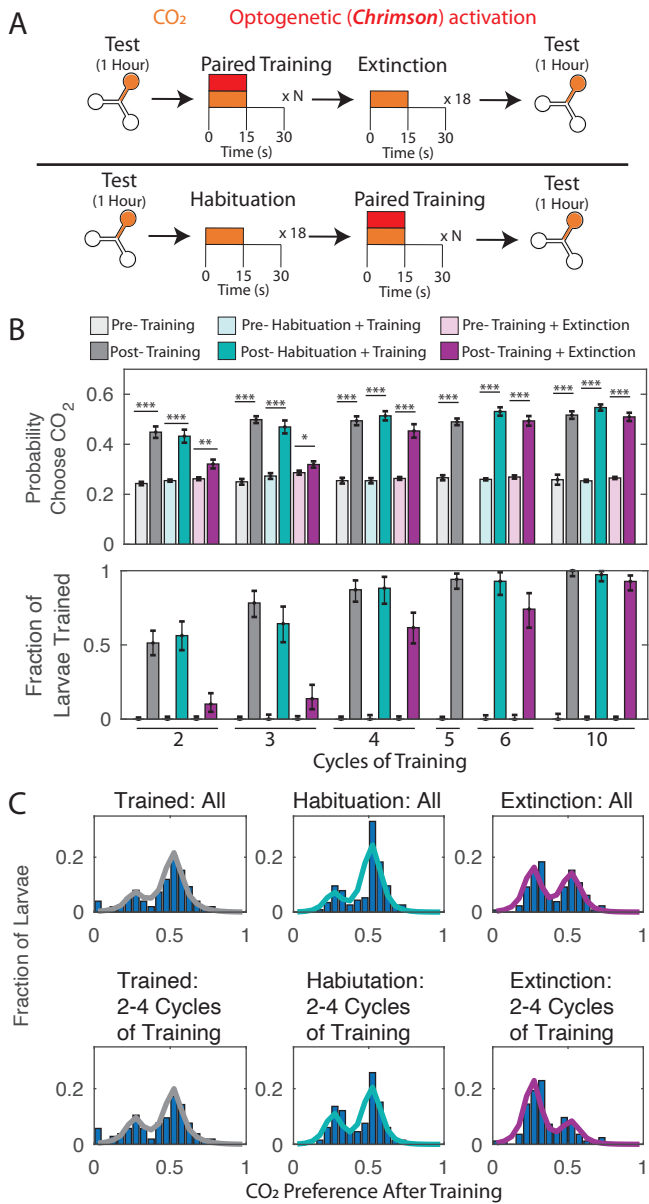

**Figure 3: Memory extinction** (A) Testing and training protocols for B,C. Training + Extinction: larvae were exposed to 18 cycles of alternating CO<sub>2</sub> and air following training. Habituation + Training: larvae were exposed to 18 cycles of alternating CO<sub>2</sub> and air prior to training. (B) Probability of choosing CO<sub>2</sub> containing channel (top) and fraction of larvae in trained group according to double Gaussian model fit (bottom) before and after training scheme. (C) Histograms of individual larva preference after training, for all larva and for larva trained with 2-4 training cycles. \*  $p < 0.05$ , \*\*  $p < 0.01$ , \*\*\*  $p < 0.001$ .

the rewarded training cycles. The extinction and habituation protocols are schematized in Figure 3A.

When we compared the ‘habituated’ groups of larvae to larvae trained for the same number of cycles without habituation or extinction, we found that un-

rewarded CO<sub>2</sub> presentation prior to training had no effect on the eventual preference change (Figure 3B). This was unsurprising, as the initial testing period already offered a number of unrewarded CO<sub>2</sub> presentations. In contrast, unrewarded CO<sub>2</sub> presentations following training reversed the effect of training; for small (2 or 3 cycles) amounts of training, the reversal was almost complete (Figure 3B).

We previously observed that associative conditioning produced a discrete and quantized change in CO<sub>2</sub> preference. Here we found that extinction following training greatly reversed the effects of conditioning. We wondered whether larvae that had been subject to both training and extinction reverted to their original CO<sub>2</sub> preference or to an intermediate state. In the former case, we would expect to see a bimodal distribution of preference change following training and extinction, while in the latter we would see a third group of larvae. This group would be most evident in experiments where 2-4 cycles of training were followed by extinction, as these had the largest deficit in the fraction of trained larvae compared to habituated larvae that received the same amount of training. We examined the preferences of all larvae following 2-4 cycles of training, grouped by whether they were normally trained, habituated, or subject to extinction (Figure 3C). In all cases, we observed two groups with the same central means and no evidence of a third intermediate group. We concluded that larvae subject to training then extinction reverted to their ‘untrained’ state.

### Larvae can retain memory overnight.

Studies in adult [47, 55–57] and larval [33–35, 58–60] *Drosophila* have identified distinct memory phases: short-term memory (STM), middle-term memory (MTM), long-term memory (LTM) and anesthesia-resistant memory (ARM). LTM and ARM are both consolidated forms of memory, which are thought to be represented by different, separate pathways [61]. ARM is resistant to anesthetic agents [62]; LTM requires cAMP response element-binding protein (CREB) dependent transcription and *de-novo* protein synthesis, while ARM does not [55, 56, 63]. Adults have been shown to retain memories for up to a week [56]. Larvae trained to associate odor with electric shock form memories that persist for at least 8 hours [33]. Odor-salt memories have been shown to persist for at least 5 hours [34, 35] and can be either ARM or LTM, depending on the initial feeding state of the larva.

We sought to determine whether we could create

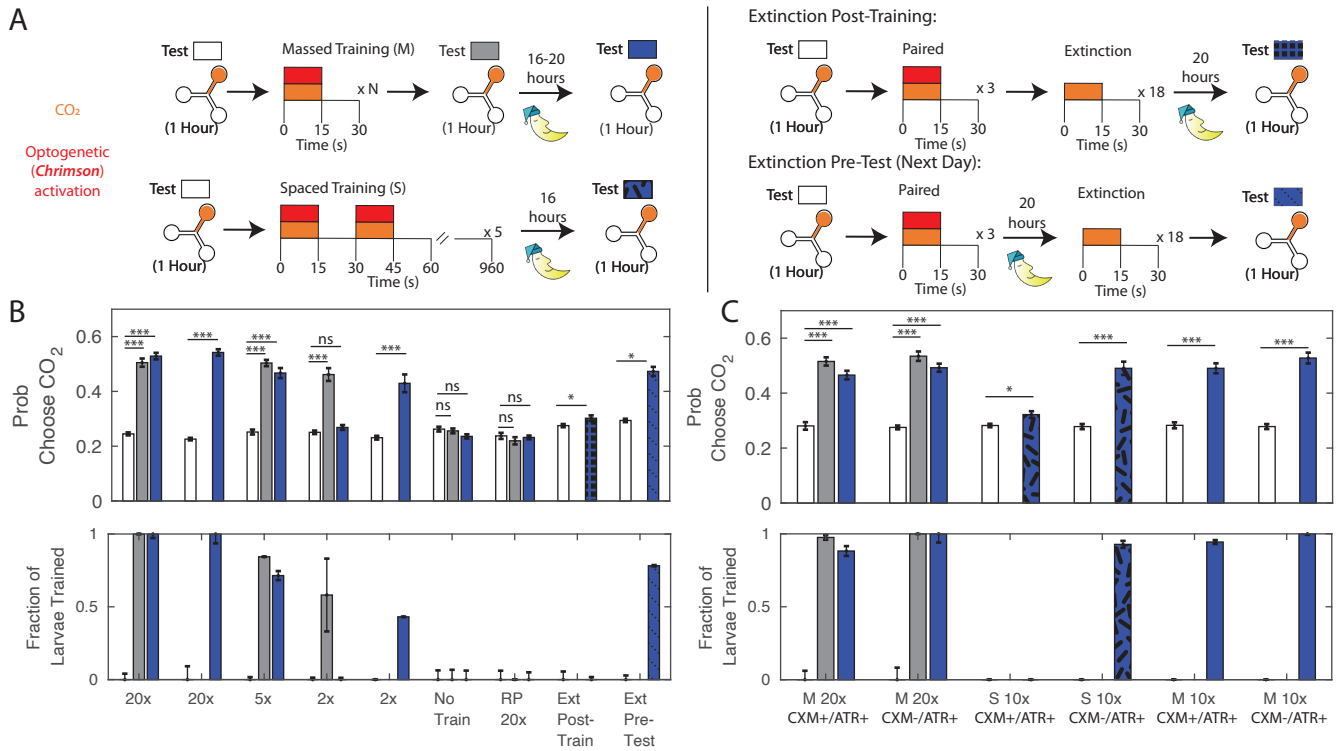

**Figure 4: Memory retention overnight.** (A) Testing and training protocols. Larvae were tested, trained immediately after testing, tested again, then placed on food overnight and tested the following day. For extinction experiments, larvae were trained 3 times, and then exposed to 18 cycles of alternating CO<sub>2</sub> and air either immediately following training or prior to testing the next day. All training was massed unless otherwise indicated. All larvae were *DAN<sup>i1</sup>>CsChrimson*. Larvae were raised on food containing ATR, except for ATR+/CXM-, ATR+/CXM+ larvae who were fed ATR supplemented yeast paste (without/with cycloheximide) for 4 hours prior to initial testing. For reverse-paired (RP) and no training schemes, see Figure 1B. (B,C) Probability of choosing CO<sub>2</sub> containing channel (top) and fraction of larvae in trained group according to double Gaussian model fit (bottom) prior to training, immediately following training, and the next day. When the center bar is missing, larvae were not tested immediately following training but instead removed immediately to food. \*  $p < 0.05$ , \*\*  $p < 0.01$ , \*\*\*  $p < 0.001$ .

consolidated memories that would persist overnight, and if so, whether these memories represented ARM or LTM.

As in the previously described experiments, we first tested each larva's individual preference in the Y-maze assay, trained it to associate CO<sub>2</sub> presentation with DAN-i1 activation, and then measured its individual preference again following training. After this second round of testing, we removed the larva from the apparatus and placed it on food (without ATR) overnight. The next day we placed the larva back in the Y-maze and again tested its preference for CO<sub>2</sub>, without any additional training.

We found that following twenty cycles of training, larvae became indifferent to CO<sub>2</sub> and this indifference persisted to the next day. Similarly, we found that most larvae that switched preference following five cycles of training retained that preference overnight. Larvae that received no training or 20

cycles of unpaired training had no change in CO<sub>2</sub> preference immediately following training or the next day (Figure 4B).

We had previously shown two cycles of training caused roughly half the larva to change preference immediately after training. We decided to use this partition to verify a correlation between immediate and long-term memories; we expected that larvae initially in the 'trained' group would also form a 'trained' group the following day. However, while we found that two cycles of training were sufficient to cause some larvae to become indifferent to CO<sub>2</sub> immediately following training, when we tested these larvae the next day, we found that all had reverted to their initial avoidance of CO<sub>2</sub>.

There were two possible explanations for this reversion. Perhaps two cycles of training were sufficient to form a short term memory, but more training was required to induce a long-term memory. Or perhaps the



testing period, in which larvae were exposed repeatedly to CO<sub>2</sub> without reward, reversed the two-cycle training. To control for the latter, we modified the experimental protocol. We tested each larva's innate preference, presented two training cycles, and then immediately removed the larva to food overnight, without any further testing. When we tested these larvae the next day, we found that they showed decreased avoidance of CO<sub>2</sub>. This indicated that two cycles of training were sufficient to form a memory lasting overnight, but that immediate exposure to unrewarded CO<sub>2</sub> following this short training interval likely reversed the effects of training, an effect we observed in Figure 3. When larvae were trained for 20 cycles, omitting the testing had no effect on these larvae's preferences the following day.

To confirm that extinction could explain the failure to form a persistent memory, we exposed larvae to three cycles of paired training, then 18 cycles of extinction (as in Figure 3) and then removed them to food overnight before testing their preferences the next day. As expected, these larvae avoided CO<sub>2</sub> as much the next day as they did prior to training (Figure 4B, Ext Post-Train).

We wondered whether memories that had consolidated overnight would be more resistant to extinction. We repeated the previous experiment with a single modification. As before, we tested the larva's initial preference and trained it with three cycles of rewarded CO<sub>2</sub> presentation. This time, we immediately removed the larva to food following training. The next day, we returned the larva to the Y-maze and presented the extinction phase of 18 unrewarded CO<sub>2</sub> presentations prior to testing for CO<sub>2</sub> preference. We found that in this case, larvae still expressed an increased preference for CO<sub>2</sub> despite the extinction phase (Figure 4B, Ext Pre-Test). The only difference between the two experiments was whether we attempted extinction immediately after training or the next day. Thus we concluded that overnight consolidation made memories more resistant to extinction.

ARM can be distinguished from LTM because the latter requires *de novo* protein synthesis and can be disrupted by ingestion of the translation-inhibitor cycloheximide (CXM). To incorporate CXM feeding, we modified our protocols. Instead of raising larvae on ATR supplemented food, we raised them on standard food and then fed them with ATR supplemented yeast paste for 4 hours prior to the experiment (ATR+/CXM-). For some larvae (ATR+/CXM+), we also added CXM to the yeast paste. In this way, we could be sure that if

ATR+/CXM+ larvae ingested enough ATR to allow for CsChrimson activation of DAN-i1, they must have also ingested CXM as well. To further verify CXM ingestion, we placed ATR+/CXM+ and ATR+/CXM- larvae on clean food and allowed them to continue development. 95% of ATR+/CXM- larvae pupated, while only 45% of ATR+/CXM+ larvae pupated.

Following the 4 hour feeding period, ATR+/CXM+ and ATR+/CXM- larvae were treated identically. As in the previously described experiments, we first tested each larva's individual preference in the Y-maze assay, trained the larva twenty times to associate CO<sub>2</sub> presentation with DAN-i1 activation, and then measured its individual preference again following training. After this second round of testing, we removed the larva from the apparatus and placed it on food (without ATR or CXM) overnight. The next day we placed the larva back in the Y-maze and again tested its preference for CO<sub>2</sub>, without any additional training.

We found that performance tested immediately after training and 16 hours after training were both unaffected by CXM treatment. Following twenty cycles of training, larvae from both groups (ATR+/CXM+; ATR+/CXM-) became indifferent to CO<sub>2</sub> and this indifference persisted to the next day (Figure 4C). This suggests that the memory formation was independent of *de novo* protein synthesis.

In adult *Drosophila*, whether ARM or LTM is formed depends on the training protocol [47, 56, 64–66]. 'Massed' training, in which all conditioning occurs in rapid sequence without rest intervals, results in ARM, while 'spaced' training, in which the conditioning occurs in blocks separated by intervals of time, produces LTM. Our training protocol more closely resembles massed training, so it seemed sensible that it would produce ARM. To see if we could also develop LTM, we established a spaced training protocol. Larvae received two paired cycles of training, followed by a 15 minutes interval of air-presentation only; this sequence was repeated five times. To keep the total length of the experiment within a (covid-related) limited daily time window, we did not test the larvae immediately after training but only the next day.

Prior to spaced training, both ATR+/CXM- and ATR+/CXM+ larvae avoided CO<sub>2</sub> to the same degree. We found that one day following spaced training, ATR+/CXM+ larvae continued to avoid CO<sub>2</sub>, while ATR+/CXM- larvae did not. This indicated that spaced training formed a memory whose retention was disrupted by CXM. To verify that spacing the trials was essential to forming a protein-synthesis

dependent memory, we duplicated the experiments exactly, except we presented 10 cycles of training *en masse*, rather than spacing them. In this case, both ATR+/CXM- and ATR-/CXM- larvae failed to avoid CO<sub>2</sub> one day following training (Figure 4C).

## Discussion

In this work, we demonstrate a new apparatus for training individual larvae and assessing their olfactory preferences. Compared to the existing paradigm, our assay allows for measuring individual animals' changes in preference due to training, allows for greater control of the temporal relation between the conditioned and unconditioned stimuli, and does not require any handling of the animals between training and testing.

In our assay, larvae learned in a quantized all-or-nothing manner. This measurement was enabled by tracking individual preferences over the course of the entire experiment. The learning process was better described as a sudden transition between states rather than a graded change in preference. We found that each cycle of training (presentation of CO<sub>2</sub> coupled with reward) either caused a state transition or did not; we found no evidence of a cumulative effect of prior training in the probability that a given cycle of training would induce a state transition in larvae that had not already transitioned. We did however find evidence that repeated cycles of training stabilized memories against later extinction effected by presentation of CO<sub>2</sub> without reward.

We also found that larvae trained in our assay retained memories overnight: 16-20 hours. When training was presented all at once, these memories were not disrupted by ingestion of the protein-synthesis inhibitor cycloheximide, while when training was spaced over time, cycloheximide feeding prevented long duration memory formation. Thus we tentatively identified spaced training as producing long term memory (LTM) and the massed training as producing anaesthesia resistant memory (ARM). This results are the first demonstration that larvae can retain memories overnight; they are entirely congruent with observations in adult flies.

We explored how the order of CO<sub>2</sub> and reward presentations affected learning. We found that for larvae to learn CO<sub>2</sub> onset must occur coincident with or before reward onset, but that it was neither necessary nor sufficient for CO<sub>2</sub> and reward to be presented together at the same time. Here our results differed from those previously reported. In other as-

says, presenting the reward (including via activation of DAN-i1) prior to presenting the conditioned odor results in *decreased* attraction/increased avoidance [9, 44] of that odor. We found that such "reverse-pairings" neither increased nor decreased a larva's avoidance of CO<sub>2</sub>. There are a number of differences - our new behavioral assay, our use of the innately aversive CO<sub>2</sub> as the conditioned odor, our activation of DAN-i1 via CsChrimson rather than ChR2-XXL, our focus on second rather than third instar larvae - that might account for the discrepancy.

One intriguing hypothesis is that this difference might be encoded in the connectivities of neurons representing CO<sub>2</sub> in the mushroom body. In the adult fly innate CO<sub>2</sub> avoidance requires MBON output [67, 68]. As in the adult [69–73], larval MBONs encode either approach or avoidance and synapse onto a convergence neuron that integrates their activities [74]. Prior to training, the approach and avoidance pathways are thought to be in balance. Learning that a stimulus is appetitive *weakens* the connection between KCs encoding that stimulus and the *avoidance* MBONs, promoting approach, while aversive conditioning weakens the connection between KCs and approach MBONs. Our observations that appetitive conditioning can eliminate CO<sub>2</sub> avoidance but not promote CO<sub>2</sub> approach and that CO<sub>2</sub> avoidance cannot be increased by reversing the reward contingency would both be explained if there are no connections from neurons representing CO<sub>2</sub> to approach promoting MBONs. In this case, the only effect of learning would be to decrease/eliminate the ability of CO<sub>2</sub> to provoke an avoidance response.

Understanding memory formation at the circuit and synaptic levels simultaneously is a heroic task, even aided by the larva's numerically simple nervous system and the tools (including EM-reconstruction) available in the larva. The work here represents progress towards this goal. We demonstrate long-term protein synthesis dependent memory, implying that memories are encoded in synaptic change. Our assay allows us to precisely identify those individuals who have formed long-term memories. Animals are found in only two behavioral states: innate avoidance or learned indifference; this likely reflects two discrete states of the underlying neural circuit.

That there are only two behavioral states and that associative conditioning produces indifference rather than attraction to CO<sub>2</sub> is most parsimoniously explained by the circuit mediating innate CO<sub>2</sub> avoidance passing through a bottleneck that is gated downstream of DAN-i1. Even if the circuit is not this simple, it remains particularly favorable to analysis.

The conditioned stimulus is sensed by a single pair of genetically identified sensory neurons; the unconditioned stimulus is provided by activation of a single pair of genetically identified reward neurons whose connectivity has been fully reconstructed [44]. How the larva navigates in response to CO<sub>2</sub> presentation has been described in detail [20, 39, 42, 75], as has been how neurons downstream of DAN-i1 and the KCs contribute to navigational decision making [9, 10, 43, 44]. This is a particularly favorable starting point to understand how synaptic plasticity due to associative conditioning leads to changes in circuit function that effect changed behavioral outcomes.

## Conclusion

We introduced a Y-maze assay capable of measuring the olfactory preferences of individual larval *Drosophila* and of *in situ* associative conditioning. We found that when larvae learn to associate CO<sub>2</sub> with reward neuron activation, the result is a switch from innate avoidance to learned indifference, with no intervening states. We demonstrated a protocol to form stable protein-synthesis dependent long term memories. This provides a strong starting point for ‘cracking’ a complete olfactory learning circuit.

## Acknowledgements

This project was supported by NSF grant 1455015, NIH grant DP2-EB022359, and a Sloan Foundation fellowship to MHG. The funders had no role in the design or analysis of the experiments.

The following ORCIDs apply to the authors: 0000-0001-6611-5941 (AL), and 0000-0001-7528-6101 (MG).

## Author Contributions

AL conceived the study, designed the Y-maze apparatus, wrote software, performed experiments, analyzed data, and wrote the manuscript. JT wrote software. JW performed experiments. MG conceived the study, designed the Y-maze apparatus, analyzed data, wrote the manuscript, and supervised the project.

## Materials and Methods

### Fly strains

The following fly strains were used:

- 20XUAS-CsChrimson-mVenus (Bloomington Stock #55136)
- SS00864 split-Gal4 (gift from Marta Zlatić, Janelia Research Campus)
- w[\*]; Gr63a[1] (Bloomington Stock #9941)
- w[1118]; Py[+t7.7] w[+mC]=GMR58E02-GAL4attP2 (Bloomington Stock #41347)

## Crosses

Virgin female *UAS-CsChrimson* flies were crossed with males of the split-Gal4 driver strain SS00864-Gal4.

For experiments in Figure 1D (R58E02>CsChrimson, Paired Training), virgin female *UAS-CsChrimson* flies were crossed with males of the Gal4 driver strain GMR58E02-GAL4.

## Larva collection

Flies were placed in 60 mm embryo-collection cages (59-100, Genesee Scientific) and allowed to lay eggs for 6 hours at 25C on enriched food media (Nutri-Fly German Food, Genesee Scientific). For all experiments except otherwise specified, the food was supplemented with 0.1 mM all-trans-retinal (ATR, Sigma Aldrich R2500). Cages were kept in the dark during egg laying. When eggs were not being collected for experiments, flies were kept on plain food at 18C.

Petri dishes containing eggs and larvae were kept at 25C in the dark for 48-60 hours. Second instar larvae were separated from food using 30% sucrose solution and washed in water. Larvae were selected for size. Preparations for experiments were carried out in a dark room.

## Y-maze

We used SLA three-dimensional printing to create microfluidic masters for casting [29, 76]. Masters were designed in Autodesk Inventor and printed on an Ember three-dimensional printer (Autodesk) using black prototyping resin (Colorado Photopolymer Solutions). After printing, masters were washed in isopropyl alcohol, air-dried, and baked at 65C for 45 minutes to remove volatile additives and non-crosslinked resin. 4% agarose (Apex Quick Dissolve LE Agarose, Cat 20-102QD, Genesee Scientific) was poured over the masters and allowed to solidify; then mazes were removed from the mold. Agarose Y-mazes were stored in tap water before use.

The mazes are 1 mm in depth. Each channel is 1.818 mm in length and 0.4 mm in width, and ends in a circular chamber (radius = 1 mm) which redirects larva back to the intersection. An inlet channel (depth = 0.1 mm, length = 1.524 mm, width = 0.1 mm) to the circular chamber connects to tubing for our network of air, CO<sub>2</sub>, and vacuum sources.

## Behavioral experiments

Individual larvae were selected for size and placed into a Y-maze using a paintbrush. The Y-maze was placed into a PDMS (Sylgard 184, 10:1 base:curing agent) base, where tubing was secured. The Y-maze and base were encased in a dark custom-built box. Larvae were monitored under 850 nm infrared illumination (Everlight Electronics Co Ltd, HIR11-21C/L11/TR8) using a Raspberry Pi NoIR camera (Adafruit, 3100), connected to a Raspberry Pi microcomputer (Raspberry Pi 3 Model B+, Adafruit, 3775). Experiments were recorded using the same camera, operating at 20 fps. Eight copies of the assay were built, to assay the behaviors of multiple larvae in parallel.

Pressure for air, CO<sub>2</sub>, and vacuum were controlled at the sources (for vacuum regulation: 41585K43, McMaster-Carr; for pressure regulation: 43275K16, McMaster-Carr). CO<sub>2</sub> and air were humidified through a bubble humidifier. Vacuum, air, and CO<sub>2</sub> tubing to individual assays were separated through a block manifold after pressure control and humidification (BHH2-12, Clippard).

The CO<sub>2</sub> concentration in the odorized channels was controlled by a resistive network of tubing connected to the air and odor sources. This inexpensive alternative to a mass-flow controller produced a stable ratio of odor to air that was consistent from day to day and independent of the overall flow rate. The direction of flow was controlled by solenoid pinch valves (NPV2-1C-03-12, Clippard), actuated by a custom circuit we designed.

Custom computer vision software detected the location of the larva in real time. Based on the larva's location, computer controlled valves manipulated the direction of airflow so that the larva was always presented with a fresh set of choices each time it approached the intersection. The software randomly decided which channel would contain air and which contained air mixed with CO<sub>2</sub>.

In each maze, one channel was selected to be the outlet for flow and the other two were inlets. An individual larva began in the outlet channel and approached the intersection of the Y-maze, then chose

to enter either an inlet branch containing air with CO<sub>2</sub> or an inlet branch containing air only. When the larva's full body entered the chosen channel, software recorded the larva's choice of channel. When the larva reached the end of that channel and entered the circular chamber, valves switched to turn off CO<sub>2</sub> and to switch vacuum to the channel containing larva, making that channel the outlet. The CO<sub>2</sub> remained off (the larva experienced only pure air) until the larva exited the circular chamber. When the larva exited the circular chamber and proceeded towards the intersection, CO<sub>2</sub> was introduced to one randomly selected inlet channel.

Software recorded the location of the larva at every frame (approx 20 Hz); the direction of airflow in the maze (which channel(s) had air; which channel had CO<sub>2</sub> mixed with air, if any; and which channel had vacuum); and all decisions the larva made. We recorded when larvae entered or left a channel, and whether that channel presented CO<sub>2</sub>. Larvae could take three actions as they approached the intersection: choose the channel containing air with CO<sub>2</sub> (scored as APPROACH); choose the channel containing pure air (scored as AVOID); or move backwards into their original channel before they reach the intersection. If a larva backed up and reentered the circular chamber it departed from before reaching the intersection, the software reset and presented the larva with a fresh set of choices when it next left the circle. We did not score backing up as a choice of either CO<sub>2</sub> or air.

Following an hour of testing, larvae were trained in the same Y-maze assay used to measure preference. During the training period, unless described otherwise, each 30-second training cycles alternated 15 seconds of CO<sub>2</sub> presentation, where both inlet channels contained a mix of CO<sub>2</sub> and air; followed by 15 seconds of air presentation, where both inlet channels has pure air. This cycle was repeated some number of times (specified for each experiment in the figures). Red LEDs (Sun LD, XZM2ACR55W-3) integrated into the setup were used to activate CsChrimson synchronously with CO<sub>2</sub> presentation (paired) or air presentation (reverse-paired).

The volume of the flow chamber was 11.68 mm<sup>3</sup> and the volume of the tubing downstream of the valves is approximately 214 mm<sup>3</sup> while the approximate flow rate is at least 560 mm<sup>3</sup>/second, so the state of the chamber was taken to be the same as the state of valves.

Following training, larvae were tested for one hour in an identical scheme to that previously described for the naive measurement.

After larvae were placed into the Y-maze, larva were left in the maze in the dark for a minimum of 5 minutes. If a larva was not moving through the maze after 5 minutes, the larva was replaced before the experiment began. If larvae stopped moving through the maze during the first hour of testing, larvae were removed from the maze before training and results were discarded. This happened infrequently (approximately 5% of experiments).

## Overnight memory formation

For the memory retention experiments of Figure 4, testing and training followed identical procedures as above to establish larva preference. After the second round of testing, the larvae were removed from the Y-maze assay with a paintbrush and transferred to an individual 4% agar plate (30 mm, FB0875711YZ Fisher Scientific), with yeast paste added. Larva were kept in the dark at 18 C for approximately 20 hours. Prior to experiments the next day, larva were removed from the agar plate and washed in water before being placed in a new Y-maze. Larvae were then tested for CO<sub>2</sub> preference for one hour as previously described. In all experiments in which larvae were removed from the apparatus and later retested, they were placed in the same apparatus but with a new agar Y-maze. Out of 317 larvae placed on agar plates to be tested the following day, 313 larvae were recovered and retested. The 4 lost larvae were excluded from analysis.

## Cycloheximide feeding protocol

For specified experiments in section Figure 4, larva were raised on ATR- food plates at 25C for 48 hours. Second instar larvae were separated from food using 30% sucrose solution and washed in water. Four hours prior to experiments, larvae were transferred to an agar dish with yeast paste for feeding. Yeast paste was made with either a solution of 35 mM cycloheximide (CXM, Sigma Aldrich C7698) and 0.1 mM all-trans-retinal (ATR, Sigma Aldrich R2500) in 5% sucrose (ATR+/CXM+); or 0.1 mM ATR in 5% sucrose (ATR+/CXM-). To verify CXM ingestion, we placed ATR+/CXM+ and ATR+/CXM- larvae not selected for experiments back on clean food and allowed them to continue development. 95% of ATR+/CXM- larvae pupated, while only 45% of ATR+/CXM+ larvae pupated. Before the experiment, larvae were transferred to an empty petri dish and washed with tap water before being placed into a maze. Except where noted, the same experimen-

tal protocol was followed as for non-CXM overnight memory.

## Protocol for cycloheximide experiments

For the CXM experiments in section Figure 4, larvae were trained with either a massed or spaced training protocol. The 20x massed training protocol was as previously described for other experiments in Figure 4.

In the 10x spaced training protocol, larvae were first tested for one hour to determine their initial CO<sub>2</sub> preference. They then received two cycles of paired DAN-i1 activation with CO<sub>2</sub> presentation (15 seconds of CO<sub>2</sub> presentation paired with reward, followed by 15 seconds of air presentation), followed by 15 minutes of air presentation. This was then repeated five times (10 activations total). In these experiments, we did not test the larvae immediately following training but instead removed them to food and tested their preferences the next day only.

The 10x massed training protocol was identical to the 10x spaced training protocol, except training consisted of 10 sequential cycles of paired DAN-i1 activation with CO<sub>2</sub> presentation (15 seconds of CO<sub>2</sub> presentation paired with reward, followed by 15 seconds of air presentation, repeated 10 times). As in the spaced training experiments, larvae were removed to food immediately following training, and their preferences were tested the next day only.

## Habituation and extinction protocols

For experiments in Figure 3, we used either an extinction or habituation protocol during training. For both types, larvae were tested for one hour to determine their innate CO<sub>2</sub> preference in the method described above.

For extinction experiments, larvae were trained in the same Y-maze used to measure preference. 30-second training cycles alternate 15 seconds of CO<sub>2</sub> presentation, where both channels contain a mix of CO<sub>2</sub> and air; followed by 15 seconds of air presentation, where neither channel had odorized air. Red LEDs were used to activate CsChrimson synchronously with CO<sub>2</sub> presentation. This training cycle was repeated some number of times (specified for each experiment above). Immediately after training, we presented the larva with 18 cycles of repeated CO<sub>2</sub>/air exposure (15 seconds of CO<sub>2</sub> followed by 15 seconds of air; repeat) with no reward pairing. After these extinction cycles, larva preference for CO<sub>2</sub> was tested for one hour.

Habituation experiments were done exactly as for extinction experiments, except that the 18 unrewarded cycles of repeated CO<sub>2</sub>/air exposure were presented immediately prior to the training cycles.

For experiments in Figure 4B, we tested each larva's initial preference for one hour, then presented 3 rewarded paired training cycles. For some larvae ('Extinction Post-Train'), we then immediately presented 18 extinction cycles, removed the larvae to food overnight as described above, and then tested their preferences for one hour the next day. For another set of larvae ('Extinction Pre-Test'), we removed the larvae to food immediately following training. The next day, after the larvae were cleaned and inserted into the Y-maze, they were exposed to 18 extinction cycles immediately prior to testing their CO<sub>2</sub> preferences for one hour.

## Protocol for timing dependence experiments

For experiments in Figure 1D, reward presentation was offset from CO<sub>2</sub> onset. 30-second training cycles alternated 15 seconds of CO<sub>2</sub> presentation, where both channels contain a mix of CO<sub>2</sub> and air; followed by 15 seconds of air presentation, where neither channel has odorized air. Red LEDs are used to activate CsChrimson for 15 seconds. For some larvae, reward onset occurred 7.5 seconds after CO<sub>2</sub> presentation; for others, reward onset occurred 7.5 seconds before CO<sub>2</sub> presentation. For all experiments of this type, larvae were presented with 20 cycles of training.

For experiments in section/figure Figure 1E, 75-second training cycles alternated 15 seconds of CO<sub>2</sub> presentation, where both inlet channels contained a mix of CO<sub>2</sub> and air with 60 seconds of air presentation. For some larvae, reward presentation occurred immediately following CO<sub>2</sub> termination for 15 seconds. For others, reward presentation occurred 15 seconds prior to CO<sub>2</sub> onset, and reward presentation was terminated upon CO<sub>2</sub> presentation. For a third group of larvae, we rewarded larvae for 15 seconds between two CO<sub>2</sub> presentations. In this case, 15 seconds of CO<sub>2</sub> presentation was followed by 15 seconds of reward presentation in the absence of CO<sub>2</sub>, followed by another 15 seconds of CO<sub>2</sub> presentation. After the second presentation, there was a 30 second air gap before the cycle repeated. For all experiments of these types, larvae were presented with 20 cycles of training.

## Data Analysis

The probability of choosing the CO<sub>2</sub> containing channel was scored for individual larvae and for populations as

$$\text{Prob choose CO}_2 = \frac{\# \text{APPROACH}}{\# \text{APPROACH} + \# \text{AVOID}} \quad (1)$$

The population average was determined by dividing the total number of times any larva in the population chose the CO<sub>2</sub> containing channel by the total number of times any larva chose either channel. In other words, larvae that made more decisions contributed more heavily to the average.

Error bars and significance tests in the figures were generated by bootstrapping. For each experimental set, we generated 10,000 numerical replicates by selecting with replacement from that set of larvae and then reanalyzing the data. Error bars were the standard deviation of these replicates. A  $p$ -value  $p < x$  indicates that at least  $x$  fraction of these replicates ended with the same ranking result (e.g.  $p < 0.01$  between trained and untrained would indicate that in at least 9900 out of 10,000 replicates, the trained group had a larger CO<sub>2</sub> preference than the untrained group or vice versa). Note that in each replicate, the same animals are included in each (e.g. trained and untrained) group. In Table S2, we also show  $p$ -values for the Fisher's exact test, which treats every decision as independent, and the Mann-Whitney  $u$ -test, which treats every larva in each group as a discrete measurement and does not account for differing numbers of decisions made by larvae.

To fit the data in Figure 2 to various models, we grouped the larvae according to the number of cycles ( $n_c$ ) of training they received. In each group, for each larva we quantified the number of decisions made following training. The number of decisions made by the  $j^{\text{th}}$  larva that received  $n_c$  cycles of training was  $n(n_c, j)$  and the fraction of times the larva chose the CO<sub>2</sub> containing channel was  $p(n_c, j)$ .

If all larva chose randomly and independently from the two channels with a fixed probability  $\bar{p}$  of choosing CO<sub>2</sub>, then we would expect that the number of times the CO<sub>2</sub> containing channel would be binomially distributed. For ease of computation, we approximated the binomial distribution as a normal distribution. In this case, the probability density of observing  $p(n_c, j)$  given  $n(n_c, j)$  would be normally distributed with mean  $\bar{p}$  and variance

$$\sigma^2 = \frac{(\bar{p})(1 - \bar{p})}{n(n_c, j)} \quad (2)$$

In fact, we found that after choosing a CO<sub>2</sub> containing channel, both naive and trained larvae are less likely to choose the CO<sub>2</sub> containing channel the next time they approach the intersection (this effect requires Gr63a so is not an analysis artifact). Because the choices are not independent, the variance of the mean of a series of choices is not given by Equation 3. Instead, we modeled the variance as

$$\sigma^2 = \tilde{\sigma}^2 \frac{(\bar{p})(1 - \bar{p})}{n(n_c, j)} \quad (3)$$

where  $\tilde{\sigma}$  was a global fit parameter in the shifting and exponential fraction models and in the shifting mean model a function of the amount training. This formulation preserved the properties that the variance should increase as the decision to choose CO<sub>2</sub> approaches 50% and should be larger when fewer decisions are averaged together. However, if we instead just assume a single global  $\sigma$ , the results of our analysis (that the exponential fraction model is preferred) are unchanged.

Given this, the probability density of observing an individual larva choosing CO<sub>2</sub>  $p(n_c, j)$  of the time was

$$p(n_c, j) = \mathcal{N} \left( p(n_c, j), \mu(n_c), \tilde{\sigma} \sqrt{\frac{\mu(n_c) * (1 - \mu(n_c))}{n(n_c, j)}} \right) \quad (4)$$

in the shifting mean model, which was represented by a single gaussian whose parameters shifted with the amount of training. In the shifting fraction model,

$$p(n_c, j) = \mathcal{N} \left( p(n_c, j), \mu_u, \tilde{\sigma} \sqrt{\frac{\mu_u * (1 - \mu_u)}{n(n_c, j)}} \right) + (1 - f_u(n_c)) \mathcal{N} \left( p(n_c, j), \mu_t, \tilde{\sigma} \sqrt{\frac{\mu_t * (1 - \mu_t)}{n(n_c, j)}} \right) \quad (5)$$

where  $f_u$ , the fraction of untrained larvae changed with the amount of training, but the means  $\mu_u$ ,  $\mu_t$  and variances of the two populations remained fixed regardless of training.

In the exponential fraction model, the fraction of untrained larvae decreased exponentially.

$$f_u = \lambda^{n_c} \quad (6)$$

These models were then fit to the data by maximizing the log-likelihood of the observed data

set using the MATLAB function `fmincon`. The predictions of these fits are shown in Figure 2. These results are summarized in Table S3, along with the Aikake and Bayes Information Criterion, AIC and BIC, which are used to compare models with different numbers of parameters. According to both AIC and BIC, the exponential fraction model is strongly favored.

## References

- [1] I. P. Pavlov, *Conditioned reflexes: an investigation of the physiological activity of the cerebral cortex*, ser. Conditioned reflexes: an investigation of the physiological activity of the cerebral cortex. Oxford, England: Oxford Univ. Press, 1927, xv, 430, Pages: xv, 430.
- [2] E. R. Kandel, Y. Dudai, and M. R. Mayford, "The molecular and systems biology of memory," *Cell*, vol. 157, no. 1, pp. 163–186, Mar. 27, 2014, ISSN: 1097-4172. DOI: 10.1016/j.cell.2014.03.001.
- [3] B. Gerber and R. F. Stocker, "The drosophila larva as a model for studying chemosensation and chemosensory learning: A review," *Chemical Senses*, vol. 32, no. 1, pp. 65–89, Jan. 1, 2007, ISSN: 0379-864X. DOI: 10.1093/chemse/bj1030.
- [4] A. Widmann, K. Eichler, M. Selcho, A. S. Thum, and D. Pauls, "Odor-taste learning in drosophila larvae," *Journal of Insect Physiology*, SI: Nutritional Homeostasis, vol. 106, pp. 47–54, Apr. 1, 2018, ISSN: 0022-1910. DOI: 10.1016/j.jinsphys.2017.08.004.
- [5] W. G. Quinn, W. A. Harris, and S. Benzer, "Conditioned behavior in drosophila melanogaster," *Proceedings of the National Academy of Sciences*, vol. 71, no. 3, pp. 708–712, Mar. 1, 1974, Publisher: National Academy of Sciences Section: Biological Sciences: Psychology, ISSN: 0027-8424, 1091-6490. DOI: 10.1073/pnas.71.3.708.
- [6] S. Scherer, R. F. Stocker, and B. Gerber, "Olfactory learning in individually assayed drosophila larvae," *Learning & Memory*, vol. 10, no. 3, pp. 217–225, May 1, 2003, ISSN: 1072-0502, 1549-5485. DOI: 10.1101/lm.57903.

- [7] A. A. Apostolopoulou, A. Widmann, A. Rohwedder, J. E. Pfitzenmaier, and A. S. Thum, "Appetitive associative olfactory learning in drosophila larvae," *Journal of Visualized Experiments : JoVE*, no. 72, Feb. 18, 2013, ISSN: 1940-087X. DOI: 10.3791/4334.
- [8] K. Neuser, J. Husse, P. Stock, and B. Gerber, "Appetitive olfactory learning in drosophila larvae: Effects of repetition, reward strength, age, gender, assay type and memory span," *Animal Behaviour*, vol. 69, no. 4, pp. 891–898, Apr. 1, 2005, ISSN: 0003-3472. DOI: 10.1016/j.anbehav.2004.06.013.
- [9] T. Saumweber, A. Rohwedder, M. Schleyer, K. Eichler, Y.-c. Chen, Y. Aso, A. Cardona, C. Eschbach, O. Kobler, A. Voigt, A. Durairaja, N. Mancini, M. Zlatic, J. W. Truman, A. S. Thum, and B. Gerber, "Functional architecture of reward learning in mushroom body extrinsic neurons of larval drosophila," *Nature Communications*, vol. 9, no. 1, pp. 1–19, Mar. 16, 2018, ISSN: 2041-1723. DOI: 10.1038/s41467-018-03130-1.
- [10] K. Eichler, F. Li, A. Litwin-Kumar, Y. Park, I. Andrade, C. M. Schneider-Mizell, T. Saumweber, A. Huser, C. Eschbach, B. Gerber, R. D. Fetter, J. W. Truman, C. E. Priebe, L. F. Abbott, A. S. Thum, M. Zlatic, and A. Cardona, "The complete connectome of a learning and memory centre in an insect brain," *Nature*, vol. 548, no. 7666, pp. 175–182, Aug. 2017, ISSN: 0028-0836, 1476-4687. DOI: 10.1038/nature23455.
- [11] H.-H. Li, J. R. Kroll, S. M. Lennox, O. Ogundeyi, J. Jeter, G. Depasquale, and J. W. Truman, "A GAL4 driver resource for developmental and behavioral studies on the larval CNS of drosophila," *Cell Reports*, vol. 8, no. 3, pp. 897–908, Aug. 7, 2014, ISSN: 2211-1247. DOI: 10.1016/j.celrep.2014.06.065.
- [12] J. B. Duffy, "GAL4 system in drosophila: A fly geneticist's swiss army knife," *genesis*, vol. 34, no. 1, pp. 1–15, 2002, ISSN: 1526-968X. DOI: 10.1002/gene.10150.
- [13] C. Eschbach and M. Zlatic, "Useful road maps: Studying drosophila larva's central nervous system with the help of connectomics," *Current Opinion in Neurobiology*, vol. 65, pp. 129–137, Dec. 1, 2020, ISSN: 0959-4388. DOI: 10.1016/j.conb.2020.09.008.
- [14] C. Eschbach, A. Fushiki, M. Winding, C. M. Schneider-Mizell, M. Shao, R. Arruda, K. Eichler, J. Valdes-Aleman, T. Ohyama, A. S. Thum, B. Gerber, R. D. Fetter, J. W. Truman, A. Litwin-Kumar, A. Cardona, and M. Zlatic, "Recurrent architecture for adaptive regulation of learning in the insect brain," *Nature Neuroscience*, vol. 23, no. 4, pp. 544–555, Apr. 2020, Number: 4 Publisher: Nature Publishing Group, ISSN: 1546-1726. DOI: 10.1038/s41593-020-0607-9.
- [15] L. Luo, M. Gershow, M. Rosenzweig, K. Kang, C. Fang-Yen, P. A. Garrity, and A. D. T. Samuel, "Navigational decision making in drosophila thermotaxis," *Journal of Neuroscience*, vol. 30, no. 12, pp. 4261–4272, Mar. 24, 2010, Publisher: Society for Neuroscience Section: Articles, ISSN: 0270-6474, 1529-2401. DOI: 10.1523/JNEUROSCI.4090-09.2010.
- [16] M. Klein, B. Afonso, A. J. Vonner, L. Hernandez-Nunez, M. Berck, C. J. Tabone, E. A. Kane, V. A. Pieribone, M. N. Nitabach, A. Cardona, M. Zlatic, S. G. Sprecher, M. Gershow, P. A. Garrity, and A. D. T. Samuel, "Sensory determinants of behavioral dynamics in drosophila thermotaxis," *Proceedings of the National Academy of Sciences*, vol. 112, no. 2, E220–E229, Jan. 13, 2015, Publisher: National Academy of Sciences Section: PNAS Plus, ISSN: 0027-8424, 1091-6490. DOI: 10.1073/pnas.1416212112.
- [17] E. Fishilevich, A. I. Domingos, K. Asahina, F. Naef, L. B. Vosshall, and M. Louis, "Chemotaxis behavior mediated by single larval olfactory neurons in drosophila," *Current Biology*, vol. 15, no. 23, pp. 2086–2096, Dec. 6, 2005, Publisher: Elsevier, ISSN: 0960-9822. DOI: 10.1016/j.cub.2005.11.016.
- [18] K. Asahina, M. Louis, S. Piccinotti, and L. B. Vosshall, "A circuit supporting concentration-invariant odor perception in drosophila," *Journal of Biology*, vol. 8, no. 1, p. 9, Jan. 26, 2009, ISSN: 1475-4924. DOI: 10.1186/jbio1108.
- [19] A. Gomez-Marin, G. J. Stephens, and M. Louis, "Active sampling and decision making in drosophila chemotaxis," *Nature Communications*, vol. 2, no. 1, p. 441, Aug. 23, 2011, Number: 1 Publisher: Nature Publishing Group, ISSN: 2041-1723. DOI: 10.1038/ncomms1455.



- [20] M. Gershow, M. Berck, D. Mathew, L. Luo, E. A. Kane, J. R. Carlson, and A. D. T. Samuel, "Controlling airborne cues to study small animal navigation," *Nature Methods*, vol. 9, no. 3, pp. 290–296, Mar. 2012, ISSN: 1548-7105. DOI: 10.1038/nmeth.1853.
- [21] A. Gomez-Marin and M. Louis, "Multilevel control of run orientation in drosophila larval chemotaxis," *Frontiers in Behavioral Neuroscience*, vol. 8, 2014, Publisher: Frontiers, ISSN: 1662-5153. DOI: 10.3389/fnbeh.2014.00038.
- [22] E. P. Sawin, L. R. Harris, A. R. Campos, and M. B. Sokolowski, "Sensorimotor transformation from light reception to phototactic behavior in *Drosophila* larvae (diptera: Drosophilidae)," *Journal of Insect Behavior*, vol. 7, no. 4, p. 553, Jul. 1, 1994, ISSN: 1572-8889. DOI: 10.1007/BF02025449.
- [23] E. A. Kane, M. Gershow, B. Afonso, I. Larderet, M. Klein, A. R. Carter, B. L. d. Bivort, S. G. Sprecher, and A. D. T. Samuel, "Sensorimotor structure of drosophila larva phototaxis," *Proceedings of the National Academy of Sciences*, vol. 110, no. 40, E3868–E3877, Oct. 1, 2013, Publisher: National Academy of Sciences Section: PNAS Plus, ISSN: 0027-8424, 1091-6490. DOI: 10.1073/pnas.1215295110.
- [24] M. Busto, B. Iyengar, and A. R. Campos, "Genetic dissection of behavior: Modulation of locomotion by light in the drosophila melanogaster larva requires genetically distinct visual system functions," *Journal of Neuroscience*, vol. 19, no. 9, pp. 3337–3344, May 1, 1999, Publisher: Society for Neuroscience Section: ARTICLE, ISSN: 0270-6474, 1529-2401. DOI: 10.1523/JNEUROSCI.19-09-03337.1999.
- [25] T.-H. Humberg, P. Bruegger, B. Afonso, M. Zlatić, J. W. Truman, M. Gershow, A. Samuel, and S. G. Sprecher, "Dedicated photoreceptor pathways in drosophila larvae mediate navigation by processing either spatial or temporal cues," *Nature Communications*, vol. 9, no. 1, p. 1260, Mar. 28, 2018, Number: 1 Publisher: Nature Publishing Group, ISSN: 2041-1723. DOI: 10.1038/s41467-018-03520-5.
- [26] M. Schleyer, M. Fendt, S. Schuller, and B. Gerber, "Associative learning of stimuli paired and unpaired with reinforcement: Evaluating evidence from maggots, flies, bees, and rats," *Frontiers in Psychology*, vol. 9, Aug. 24, 2018, ISSN: 1664-1078. DOI: 10.3389/fpsyg.2018.01494.
- [27] B. Gerber, R. Biernacki, and J. Thum, "Odor–taste learning assays in drosophila larvae," *Cold Spring Harbor Protocols*, vol. 2013, no. 3, pdb.prot071639, Mar. 1, 2013, ISSN: 1940-3402, 1559-6095. DOI: 10.1101/pdb.prot071639.
- [28] A. Weiglein, F. Gerstner, N. Mancini, M. Schleyer, and B. Gerber, "One-trial learning in larval drosophila," *Learning & Memory*, vol. 26, no. 4, pp. 109–120, Apr. 1, 2019, Company: Cold Spring Harbor Laboratory Press Distributor: Cold Spring Harbor Laboratory Press Institution: Cold Spring Harbor Laboratory Press Label: Cold Spring Harbor Laboratory Press Publisher: Cold Spring Harbor Lab, ISSN: 1072-0502, 1549-5485. DOI: 10.1101/lm.049106.118.
- [29] D. Karagyozov, M. M. Skanata, A. Lesar, and M. Gershow, "Recording neural activity in unrestrained animals with three-dimensional tracking two-photon microscopy," *Cell Reports*, vol. 25, no. 5, 1371–1383.e10, Oct. 30, 2018, ISSN: 2211-1247. DOI: 10.1016/j.celrep.2018.10.013.
- [30] L. He, S. Gulyanov, M. M. Skanata, D. Karagyozov, E. S. Heckscher, M. Krieg, G. Tsechpenakis, M. Gershow, and W. D. Tracey, "Direction selectivity in drosophila proprioceptors requires the mechanosensory channel tmc," *Current Biology*, vol. 29, no. 6, 945–956.e3, Mar. 18, 2019, Publisher: Elsevier, ISSN: 0960-9822. DOI: 10.1016/j.cub.2019.02.025.
- [31] S.-Y. Takemura, Y. Aso, T. Hige, A. Wong, Z. Lu, C. S. Xu, P. K. Rivlin, H. Hess, T. Zhao, T. Parag, S. Berg, G. Huang, W. Katz, D. J. Olbris, S. Plaza, L. Umayam, R. Aniceto, L.-A. Chang, S. Lauchie, O. Ogundeyi, C. Ordish, A. Shinomiya, C. Sigmund, S. Takemura, J. Tran, G. C. Turner, G. M. Rubin, and L. K. Scheffer, "A connectome of a learning and memory center in the adult drosophila brain," *eLife*, vol. 6, Jul. 18, 2017, ISSN: 2050-084X. DOI: 10.7554/eLife.26975.
- [32] M. E. Berck, A. Khandelwal, L. Claus, L. Hernandez-Nunez, G. Si, C. J. Tabone, F. Li, J. W. Truman, R. D. Fetter, M. Louis, A. D. Samuel, and A. Cardona, "The wiring diagram of a glomerular olfactory system," *eLife*, vol. 5, R. L. Calabrese, Ed., e14859, May 13, 2016,

- Publisher: eLife Sciences Publications, Ltd, ISSN: 2050-084X. DOI: 10.7554/eLife.14859.
- [33] S. Khurana, M. B. Abubaker, and O. Siddiqi, “Odour avoidance learning in the larva of *Drosophila melanogaster*,” *Journal of Biosciences*, vol. 34, no. 4, pp. 621–631, Oct. 2009, ISSN: 0250-5991, 0973-7138. DOI: 10.1007/s12038-009-0080-9.
- [34] A. Widmann, M. Artinger, L. Biesinger, K. Boepple, C. Peters, J. Schlechter, M. Selcho, and A. S. Thum, “Genetic dissection of aversive associative olfactory learning and memory in *Drosophila* larvae,” *PLOS Genetics*, vol. 12, no. 10, e1006378, Oct. 21, 2016, Publisher: Public Library of Science, ISSN: 1553-7404. DOI: 10.1371/journal.pgen.1006378.
- [35] M. Eschment, H. R. Franz, N. Güllü, L. G. Hölscher, K.-E. Huh, and A. Widmann, “Insulin signaling represents a gating mechanism between different memory phases in *Drosophila* larvae,” *PLOS Genetics*, vol. 16, no. 10, e1009064, Oct. 26, 2020, Publisher: Public Library of Science, ISSN: 1553-7404. DOI: 10.1371/journal.pgen.1009064.
- [36] S. M. Buchanan, J. S. Kain, and B. L. de Bivort, “Neuronal control of locomotor handedness in *Drosophila*,” *Proceedings of the National Academy of Sciences of the United States of America*, vol. 112, no. 21, pp. 6700–6705, May 26, 2015, ISSN: 0027-8424. DOI: 10.1073/pnas.1500804112.
- [37] E. S. Heckscher, S. R. Lockery, and C. Q. Doe, “Characterization of *Drosophila* larval crawling at the level of organism, segment, and somatic body wall musculature,” *Journal of Neuroscience*, vol. 32, no. 36, pp. 12460–12471, Sep. 5, 2012, ISSN: 0270-6474, 1529-2401. DOI: 10.1523/JNEUROSCI.0222-12.2012.
- [38] X. Sun and E. S. Heckscher, “Using linear agarose channels to study *Drosophila* larval crawling behavior,” *JoVE (Journal of Visualized Experiments)*, no. 117, e54892, Nov. 26, 2016, ISSN: 1940-087X. DOI: 10.3791/54892.
- [39] C. Faucher, M. Forstreuter, M. Hilker, and M. d. Bruyne, “Behavioral responses of *Drosophila* to biogenic levels of carbon dioxide depend on life-stage, sex and olfactory context,” *Journal of Experimental Biology*, vol. 209, no. 14, pp. 2739–2748, Jul. 15, 2006, ISSN: 0022-0949, 1477-9145. DOI: 10.1242/jeb.02297.
- [40] W. D. Jones, P. Cayirlioglu, I. Grunwald Kadow, and L. B. Vosshall, “Two chemosensory receptors together mediate carbon dioxide detection in *Drosophila*,” *Nature*, vol. 445, no. 7123, pp. 86–90, Jan. 2007, ISSN: 1476-4687. DOI: 10.1038/nature05466.
- [41] J. Y. Kwon, A. Dahanukar, L. A. Weiss, and J. R. Carlson, “The molecular basis of CO<sub>2</sub> reception in *Drosophila*,” *Proceedings of the National Academy of Sciences of the United States of America*, vol. 104, no. 9, pp. 3574–3578, Feb. 27, 2007, ISSN: 0027-8424. DOI: 10.1073/pnas.0700079104.
- [42] R. Gepner, M. Mihovilovic Skanata, N. M. Bernat, M. Kaplow, and M. Gershow, “Computations underlying *Drosophila* photo-taxis, odor-taxis, and multi-sensory integration,” *eLife*, vol. 4, R. L. Calabrese, Ed., e06229, May 6, 2015, ISSN: 2050-084X. DOI: 10.7554/eLife.06229.
- [43] A. S. Thum and B. Gerber, “Connectomics and function of a memory network: The mushroom body of larval *Drosophila*,” *Current Opinion in Neurobiology*, *Neurobiology of Learning and Plasticity*, vol. 54, pp. 146–154, Feb. 1, 2019, ISSN: 0959-4388. DOI: 10.1016/j.conb.2018.10.007.
- [44] M. Schleyer, A. Weiglein, J. Thoener, M. Strauch, V. Hartenstein, M. K. Weigelt, S. Schuller, T. Saumweber, K. Eichler, A. Rohwedder, D. Merhof, M. Zlatic, A. S. Thum, and B. Gerber, “Identification of dopaminergic neurons that can both establish associative memory and acutely terminate its behavioral expression,” *Journal of Neuroscience*, vol. 40, no. 31, pp. 5990–6006, Jul. 29, 2020, Publisher: Society for Neuroscience Section: Research Articles, ISSN: 0270-6474, 1529-2401. DOI: 10.1523/JNEUROSCI.0290-20.2020.
- [45] A. Rohwedder, N. L. Wenz, B. Stehle, A. Huser, N. Yamagata, M. Zlatic, J. W. Truman, H. Tanimoto, T. Saumweber, B. Gerber, and A. S. Thum, “Four individually identified paired dopamine neurons signal reward in larval *Drosophila*,” *Current Biology*, vol. 26, no. 5, pp. 661–669, Mar. 7, 2016, ISSN: 0960-9822. DOI: 10.1016/j.cub.2016.01.012.
- [46] R. Lyutova, M. Selcho, M. Pfeuffer, D. Segebarth, J. Habenstein, A. Rohwedder, F. Frantzmann, C. Wegener, A. S. Thum, and D. Pauls, “Reward signaling in a recurrent circuit of

- dopaminergic neurons and peptidergic kenyon cells,” *Nature Communications*, vol. 10, Jul. 15, 2019, ISSN: 2041-1723. DOI: 10.1038/s41467-019-11092-1.
- [47] T. Tully, S. Boynton, C. Brandes, J. M. Dura, R. Mihalek, T. Preat, and A. Vilella, “Genetic dissection of memory formation in drosophila melanogaster,” *Cold Spring Harbor Symposia on Quantitative Biology*, vol. 55, pp. 203–211, Jan. 1, 1990, Publisher: Cold Spring Harbor Laboratory Press, ISSN: 0091-7451, 1943-4456. DOI: 10.1101/SQB.1990.055.01.022.
- [48] Q. Ren, H. Li, Y. Wu, J. Ren, and A. Guo, “A GABAergic inhibitory neural circuit regulates visual reversal learning in drosophila,” *The Journal of Neuroscience: The Official Journal of the Society for Neuroscience*, vol. 32, no. 34, pp. 11 524–11 538, Aug. 22, 2012, ISSN: 1529-2401. DOI: 10.1523/JNEUROSCI.0827-12.2012.
- [49] Y. Wu, Q. Ren, H. Li, and A. Guo, “The GABAergic anterior paired lateral neurons facilitate olfactory reversal learning in drosophila,” *Learning & Memory (Cold Spring Harbor, N.Y.)*, vol. 19, no. 10, pp. 478–486, Sep. 17, 2012, ISSN: 1549-5485. DOI: 10.1101/1m.025726.112.
- [50] K. Vogt, A. Yarali, and H. Tanimoto, “Reversing stimulus timing in visual conditioning leads to memories with opposite valence in drosophila,” *PLOS ONE*, vol. 10, no. 10, e0139797, Oct. 2, 2015, Publisher: Public Library of Science, ISSN: 1932-6203. DOI: 10.1371/journal.pone.0139797.
- [51] N. Mancini, S. Hranova, J. Weber, A. Weiglein, M. Schleyer, D. Weber, A. S. Thum, and B. Gerber, “Reversal learning in drosophila larvae,” *Learning & Memory*, vol. 26, no. 11, pp. 424–435, Nov. 2019, ISSN: 1072-0502. DOI: 10.1101/1m.049510.119.
- [52] J. Felsenberg, O. Barnstedt, P. Cognigni, S. Lin, and S. Waddell, “Re-evaluation of learned information in drosophila,” *Nature*, vol. 544, no. 7649, pp. 240–244, Apr. 2017, Number: 7649 Publisher: Nature Publishing Group, ISSN: 1476-4687. DOI: 10.1038/nature21716.
- [53] J. Felsenberg, P. F. Jacob, T. Walker, O. Barnstedt, A. J. Edmondson-Stait, M. W. Pleijzier, N. Otto, P. Schlegel, N. Sharifi, E. Perisse, C. S. Smith, J. S. Lauritzen, M. Costa, G. S. X. E. Jefferis, D. D. Bock, and S. Waddell, “Integration of parallel opposing memories underlies memory extinction,” *Cell*, vol. 175, no. 3, 709–722.e15, Oct. 18, 2018, ISSN: 0092-8674. DOI: 10.1016/j.cell.2018.08.021.
- [54] M. Schwaerzel, M. Heisenberg, and T. Zars, “Extinction antagonizes olfactory memory at the subcellular level,” *Neuron*, vol. 35, no. 5, pp. 951–960, Aug. 29, 2002, Publisher: Elsevier, ISSN: 0896-6273. DOI: 10.1016/S0896-6273(02)00832-2.
- [55] T. Tully, V. Cambiazo, and L. Kruse, “Memory through metamorphosis in normal and mutant drosophila,” *Journal of Neuroscience*, vol. 14, no. 1, pp. 68–74, Jan. 1, 1994, Publisher: Society for Neuroscience Section: Articles, ISSN: 0270-6474, 1529-2401. DOI: 10.1523/JNEUROSCI.14-01-00068.1994.
- [56] J. C. Yin, J. S. Wallach, M. Del Vecchio, E. L. Wilder, H. Zhou, W. G. Quinn, and T. Tully, “Induction of a dominant negative CREB transgene specifically blocks long-term memory in drosophila,” *Cell*, vol. 79, no. 1, pp. 49–58, Oct. 7, 1994, ISSN: 0092-8674. DOI: 10.1016/0092-8674(94)90399-9.
- [57] C. Margulies, T. Tully, and J. Dubnau, “Deconstructing memory in drosophila,” *Current biology : CB*, vol. 15, no. 17, R700–R713, Sep. 6, 2005, ISSN: 0960-9822. DOI: 10.1016/j.cub.2005.08.024.
- [58] K. Honjo and K. Furukubo-Tokunaga, “Induction of cAMP response element-binding protein-dependent medium-term memory by appetitive gustatory reinforcement in drosophila larvae,” *Journal of Neuroscience*, vol. 25, no. 35, pp. 7905–7913, Aug. 31, 2005, Publisher: Society for Neuroscience Section: Behavioral/Systems/Cognitive, ISSN: 0270-6474, 1529-2401. DOI: 10.1523/JNEUROSCI.2135-05.2005.
- [59] —, “Distinctive neuronal networks and biochemical pathways for appetitive and aversive memory in drosophila larvae,” *The Journal of Neuroscience*, vol. 29, no. 3, pp. 852–862, Jan. 21, 2009, ISSN: 0270-6474. DOI: 10.1523/JNEUROSCI.1315-08.2009.
- [60] E. O. Aceves-Piña and W. G. Quinn, “Learning in normal and mutant drosophila larvae,” *Science*, vol. 206, no. 4414, pp. 93–96, Oct. 5, 1979, Publisher: American Association for the Advancement of Science Section: Reports, ISSN:

- 0036-8075, 1095-9203. DOI: 10.1126/science.206.4414.93.
- [61] G. Isabel, A. Pascual, and T. Preat, “Exclusive consolidated memory phases in drosophila,” *Science (New York, N.Y.)*, vol. 304, no. 5673, pp. 1024–1027, May 14, 2004, ISSN: 1095-9203. DOI: 10.1126/science.1094932.
- [62] W. G. Quinn and Y. Dudai, “Memory phases in drosophila,” *Nature*, vol. 262, no. 5569, pp. 576–577, Aug. 1976, Number: 5569 Publisher: Nature Publishing Group, ISSN: 1476-4687. DOI: 10.1038/262576a0.
- [63] B. Perazzona, G. Isabel, T. Preat, and R. L. Davis, “The role of cAMP response element-binding protein in drosophila long-term memory,” *The Journal of Neuroscience: The Official Journal of the Society for Neuroscience*, vol. 24, no. 40, pp. 8823–8828, Oct. 6, 2004, ISSN: 1529-2401. DOI: 10.1523/JNEUROSCI.4542-03.2004.
- [64] T. Tully, T. Preat, S. C. Boynton, and M. Del Vecchio, “Genetic dissection of consolidated memory in drosophila,” *Cell*, vol. 79, no. 1, pp. 35–47, Oct. 7, 1994, ISSN: 0092-8674. DOI: 10.1016/0092-8674(94)90398-0.
- [65] D. Yu, D.-B. G. Akalal, and R. L. Davis, “Drosophila / mushroom body neurons form a branch-specific, long-term cellular memory trace after spaced olfactory conditioning,” *Neuron*, vol. 52, no. 5, pp. 845–855, Dec. 7, 2006, ISSN: 0896-6273. DOI: 10.1016/j.neuron.2006.10.030.
- [66] E. Bouzaiane, S. Trannoy, L. Scheunemann, P.-Y. Plaçais, and T. Preat, “Two independent mushroom body output circuits retrieve the six discrete components of drosophila aversive memory,” *Cell Reports*, vol. 11, no. 8, pp. 1280–1292, May 26, 2015, ISSN: 2211-1247. DOI: 10.1016/j.celrep.2015.04.044.
- [67] L. B. Bräcker, K. P. Siju, N. Varela, Y. Aso, M. Zhang, I. Hein, M. L. Vasconcelos, and I. C. Grunwald Kadow, “Essential role of the mushroom body in context-dependent CO<sub>2</sub> avoidance in drosophila,” *Current Biology*, vol. 23, no. 13, pp. 1228–1234, Jul. 8, 2013, ISSN: 0960-9822. DOI: 10.1016/j.cub.2013.05.029.
- [68] L. P. C. Lewis, K. P. Siju, Y. Aso, A. B. Friedrich, A. J. B. Bulteel, G. M. Rubin, and I. C. Grunwald Kadow, “A higher brain circuit for immediate integration of conflicting sensory information in drosophila,” *Current Biology*, vol. 25, no. 17, pp. 2203–2214, Aug. 31, 2015, ISSN: 0960-9822. DOI: 10.1016/j.cub.2015.07.015.
- [69] Y. Aso, D. Sitaraman, T. Ichinose, K. R. Kaun, K. Vogt, G. Belliart-Guérin, P.-Y. Plaçais, A. A. Robie, N. Yamagata, C. Schnaitmann, W. J. Rowell, R. M. Johnston, T.-T. B. Ngo, N. Chen, W. Korff, M. N. Nitabach, U. Heberlein, T. Preat, K. M. Branson, H. Tanimoto, and G. M. Rubin, “Mushroom body output neurons encode valence and guide memory-based action selection in drosophila,” *eLife*, vol. 3, L. Luo, Ed., e04580, Dec. 23, 2014, Publisher: eLife Sciences Publications, Ltd, ISSN: 2050-084X. DOI: 10.7554/eLife.04580.
- [70] E. Perisse, Y. Yin, A. C. Lin, S. Lin, W. Huetteroth, and S. Waddell, “Different kenyon cell populations drive learned approach and avoidance in drosophila,” *Neuron*, vol. 79, no. 5, pp. 945–956, Sep. 4, 2013, ISSN: 0896-6273. DOI: 10.1016/j.neuron.2013.07.045.
- [71] D. Oswald, J. Felsenberg, C. B. Talbot, G. Das, E. Perisse, W. Huetteroth, and S. Waddell, “Activity of defined mushroom body output neurons underlies learned olfactory behavior in drosophila,” *Neuron*, vol. 86, no. 2, pp. 417–427, Apr. 22, 2015, ISSN: 0896-6273. DOI: 10.1016/j.neuron.2015.03.025.
- [72] D. Oswald and S. Waddell, “Olfactory learning skews mushroom body output pathways to steer behavioral choice in drosophila,” *Current Opinion in Neurobiology*, vol. 35, pp. 178–184, Dec. 2015, ISSN: 0959-4388. DOI: 10.1016/j.conb.2015.10.002.
- [73] T. Hige, Y. Aso, M. N. Modi, G. M. Rubin, and G. C. Turner, “Heterosynaptic plasticity underlies aversive olfactory learning in drosophila,” *Neuron*, vol. 88, no. 5, pp. 985–998, Dec. 2, 2015, ISSN: 0896-6273. DOI: 10.1016/j.neuron.2015.11.003.
- [74] C. Eschbach, A. Fushiki, M. Winding, B. Afonso, I. V. Andrade, B. T. Cocanougher, K. Eichler, R. Gepner, G. Si, J. Valdes-Aleman, M. Gershow, G. S. Jefferis, J. W. Truman, R. D. Fetter, A. Samuel, A. Cardona, and M. Zlatić, “Circuits for integrating learnt and innate valences in the fly brain,” *Neuroscience*, preprint, Apr. 24, 2020. DOI: 10.1101/2020.04.23.058339.

- [75] R. Gepner, J. Wolk, D. S. Wadekar, S. Dvali, and M. Gershow, “Variance adaptation in navigational decision making,” *eLife*, vol. 7, R. L. Calabrese, Ed., e37945, Nov. 27, 2018, Publisher: eLife Sciences Publications, Ltd, ISSN: 2050-084X. DOI: 10.7554/eLife.37945.
- [76] H. N. Chan, Y. Chen, Y. Shu, Y. Chen, Q. Tian, and H. Wu, “Direct, one-step molding of 3d-printed structures for convenient fabrication of truly 3d PDMS microfluidic chips,” *Microfluidics and Nanofluidics*, vol. 19, no. 1, pp. 9–18, Jul. 1, 2015, ISSN: 1613-4990. DOI: 10.1007/s10404-014-1542-4.

## Supplemental Movies

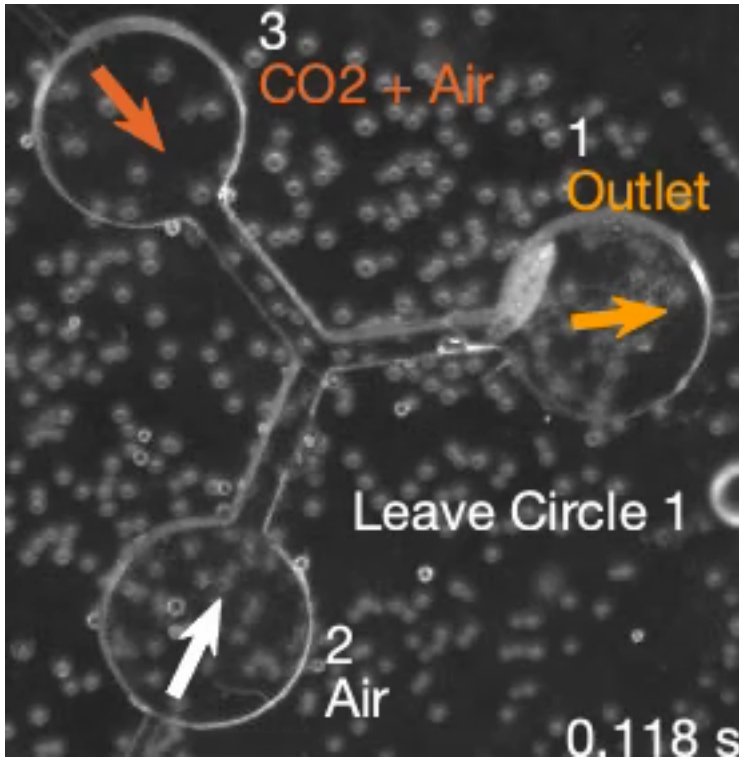

**Figure S1: Supplemental Movie 1:** Recording of a larva making 2 decisions within the Y-maze. The direction of airflow and the larva's decisions are noted. Video was recorded at 20 frames per second; the playback speed of 25 fps represents 1.25x real time.

## Supplemental Tables

**Table S1:** Data for experiments in Figure 1, Figure 2, Figure 3, and Figure 4. # Larva: number of individual larvae tested for experiment type; # Approach Pre-Train: total number of times all larvae chose the channel containing air with CO<sub>2</sub> prior to training; # Avoid Pre-Train: total number of times all larvae chose the channel containing pure air prior to training; # Approach Post-Train: total number of times all larvae chose the channel containing air with CO<sub>2</sub> after the indicated training scheme; # Avoid Post-Train: total number of times all larvae chose the channel containing pure air after the indicated training scheme; # Approach Next Day: total number of times all larvae chose the channel containing air with CO<sub>2</sub> during testing approximately 20 hours after training; # Avoid Next: total number of times all larvae chose the channel containing pure air during testing approximately 20 hours after training. All tests were 1 hour (for each larva).

| Experiment                    | Genotype             | # Larva | # Ap-<br>proach<br>Pre-<br>Train | # Avoid<br>Pre-<br>Train | # Ap-<br>proach<br>Post-<br>Train | # Avoid<br>Post-<br>Train | # Ap-<br>proach<br>Next<br>Day | # Avoid<br>Next<br>Day |
|-------------------------------|----------------------|---------|----------------------------------|--------------------------|-----------------------------------|---------------------------|--------------------------------|------------------------|
| <b>Figure 1B</b>              |                      |         |                                  |                          |                                   |                           |                                |                        |
| Gr63a <sup>1</sup>            | Gr63a <sup>1</sup>   | 44      | 831                              | 745                      | -                                 | -                         | -                              | -                      |
| DANi1><br>CsChrimson,<br>ATR+ | DANi1><br>CsChrimson | 159     | 1714                             | 4978                     | -                                 | -                         | -                              | -                      |
| DANi1><br>CsChrimson,<br>ATR- | DANi1><br>CsChrimson | 16      | 256                              | 614                      | -                                 | -                         | -                              | -                      |
| <b>Figure 1D</b>              |                      |         |                                  |                          |                                   |                           |                                |                        |
| Paired                        | DANi1><br>CsChrimson | 64      | 561                              | 1760                     | 936                               | 868                       | -                              | -                      |
| Offset After                  | DANi1><br>CsChrimson | 20      | 288                              | 757                      | 316                               | 305                       | -                              | -                      |
| Reverse Paired                | DANi1><br>CsChrimson | 29      | 315                              | 1022                     | 154                               | 530                       | -                              | -                      |
| Offset Before                 | DANi1><br>CsChrimson | 19      | 218                              | 512                      | 136                               | 315                       | -                              | -                      |
| Paired, ATR-                  | DANi1><br>CsChrimson | 16      | 256                              | 614                      | 127                               | 307                       | -                              | -                      |
| No Training                   | DANi1><br>CsChrimson | 50      | 578                              | 1599                     | 479                               | 1295                      | -                              | -                      |
| DAN w/o CO <sub>2</sub>       | DANi1><br>CsChrimson | 16      | 260                              | 597                      | 161                               | 354                       | -                              | -                      |
| Driver ctrl                   | SS00864              | 17      | 110                              | 289                      | 158                               | 358                       | -                              | -                      |
| Effector ctrl                 | UAS-<br>CsChrimson   | 18      | 214                              | 516                      | 114                               | 294                       | -                              | -                      |
| 58E02><br>CsChrimson          | 58E02><br>CsChrimson | 21      | 380                              | 912                      | 493                               | 501                       | -                              | -                      |
| <b>Figure 1E</b>              |                      |         |                                  |                          |                                   |                           |                                |                        |
|                               | DANi1><br>CsChrimson |         |                                  |                          |                                   |                           |                                |                        |
| Paired                        |                      | 22      | 181                              | 496                      | 350                               | 337                       | -                              | -                      |
| Reverse Paired                |                      | 18      | 181                              | 438                      | 124                               | 320                       | -                              | -                      |
| Btw CO <sub>2</sub>           |                      | 23      | 272                              | 652                      | 165                               | 283                       | -                              | -                      |
| <b>Figure 1F</b>              |                      |         |                                  |                          |                                   |                           |                                |                        |
|                               | DANi1><br>CsChrimson |         |                                  |                          |                                   |                           |                                |                        |
| 6.5%                          |                      | 19      | 361                              | 568                      | 319                               | 290                       | -                              | -                      |

|                                  |                     |     |      |      |      |   |   |
|----------------------------------|---------------------|-----|------|------|------|---|---|
| 8%                               | 22                  | 249 | 516  | 298  | 251  | - | - |
| 15%                              | 19                  | 170 | 368  | 249  | 233  | - | - |
| 18%                              | 64                  | 561 | 1760 | 936  | 868  | - | - |
| <b>Figure 2A</b>                 | DAN1><br>CsChrimson |     |      |      |      |   |   |
| 0 Cycles                         | 50                  | 578 | 1599 | 479  | 1295 | - | - |
| 1 Cycles                         | 35                  | 218 | 606  | 317  | 495  | - | - |
| 2 Cycles                         | 87                  | 840 | 2552 | 1081 | 1292 | - | - |
| 3 Cycles                         | 30                  | 308 | 924  | 675  | 679  | - | - |
| 4 Cycles                         | 30                  | 225 | 659  | 490  | 502  | - | - |
| 5 Cycles                         | 62                  | 850 | 2453 | 974  | 987  | - | - |
| 10 Cycles                        | 14                  | 100 | 287  | 154  | 144  | - | - |
| 20 Cycles                        | 64                  | 561 | 1760 | 936  | 868  | - | - |
| <b>Figure 3B</b>                 | DAN1><br>CsChrimson |     |      |      |      |   |   |
| 2 Cycles, Training               | 45                  | 326 | 1015 | 487  | 599  | - | - |
| 2 Cycles, Habituation + Training | 30                  | 385 | 1127 | 422  | 554  | - | - |
| 2 Cycles, Training + Extinction  | 30                  | 336 | 946  | 375  | 793  | - | - |
| 3 Cycles, Training               | 30                  | 308 | 924  | 675  | 679  | - | - |
| 3 Cycles, Habituation + Training | 18                  | 222 | 591  | 260  | 294  | - | - |
| 3 Cycles, Training + Extinction  | 26                  | 279 | 695  | 195  | 416  | - | - |
| 4 Cycles, Training               | 30                  | 225 | 659  | 490  | 502  | - | - |
| 4 Cycles, Habituation + Training | 18                  | 239 | 701  | 372  | 352  | - | - |
| 4 Cycles, Training + Extinction  | 27                  | 384 | 1074 | 394  | 475  | - | - |
| 5 Cycles, Training               | 32                  | 346 | 954  | 476  | 496  | - | - |
| 6 Cycles, Habituation + Training | 19                  | 266 | 758  | 367  | 324  | - | - |
| 6 Cycles, Training + Extinction  | 18                  | 253 | 687  | 309  | 317  | - | - |
| 10 Cycles, Training              | 14                  | 100 | 287  | 154  | 144  | - | - |



|                                   |                      |     |      |     |     |     |     |
|-----------------------------------|----------------------|-----|------|-----|-----|-----|-----|
| 10 Cycles, Habituation + Training | 30                   | 406 | 1193 | 607 | 503 | -   | -   |
| 10 Cycles, Training + Extinction  | 30                   | 426 | 1180 | 401 | 386 | -   | -   |
| <b>Figure 4B</b>                  | DANi1><br>CsChrimson |     |      |     |     |     |     |
| 20x                               | 28                   | 380 | 1172 | 509 | 499 | 459 | 409 |
| 20x (Only Test Next Day)          | 14                   | 224 | 768  | -   | -   | 296 | 250 |
| 5x                                | 30                   | 504 | 1499 | 498 | 491 | 404 | 461 |
| 2x                                | 42                   | 514 | 1537 | 594 | 693 | 201 | 548 |
| 2x (Only Test Next Day)           | 22                   | 209 | 696  | -   | -   | 213 | 283 |
| No Train                          | 20                   | 316 | 889  | 187 | 544 | 104 | 337 |
| RP 20x                            | 21                   | 282 | 905  | 121 | 430 | 109 | 361 |
| Ext Post-Train                    | 23                   | 181 | 477  | -   | -   | 158 | 365 |
| Ext Pre-Test                      | 31                   | 417 | 1002 | -   | -   | 385 | 429 |
| <b>Figure 4C</b>                  | DANi1><br>CsChrimson |     |      |     |     |     |     |
| M 20x (CXM+/ATR+)                 | 20                   | 110 | 282  | 252 | 237 | 237 | 272 |
| M 20x (CXM-/ATR+)                 | 17                   | 159 | 419  | 271 | 236 | 228 | 235 |
| S 20x (CXM+/ATR+)                 | 23                   | 191 | 486  | -   | -   | 150 | 316 |
| S 20x (CXM-/ATR+)                 | 20                   | 197 | 511  | -   | -   | 254 | 264 |
| M 10x (CXM+/ATR+)                 | 23                   | 136 | 345  | -   | -   | 331 | 344 |
| M 10x (CXM-/ATR+)                 | 20                   | 175 | 454  | -   | -   | 419 | 375 |

**Table S2:** *P*-values for experiments in Figure 1, Figure 2, Figure 3, and Figure 4. *P*-values for experiments were calculated: Bootstrap - *p*-values calculated as explained in Methods; Fisher - *p*-values calculated using Fisher's exact test; U-test - *p*-values calculated using two-sided Mann-Whitney U test. Unless otherwise noted, *p*-values are calculated for pre-train and post-train data. A shaded row indicates not all tests reach the same significance level (out of ns,  $p < 0.05$ ,  $p < 0.01$ ,  $p < 0.001$ )

| Experiment                 | Genotype             | Bootstrap         | Fisher            | U-test            |
|----------------------------|----------------------|-------------------|-------------------|-------------------|
| <b>Figure 1B</b>           |                      |                   |                   |                   |
| Gr63a <sup>1</sup> /DANi1> |                      | <10 <sup>-4</sup> | <10 <sup>-4</sup> | <10 <sup>-4</sup> |
| CsChrimson, ATR+           |                      |                   |                   |                   |
| Gr63a <sup>1</sup> /DANi1> |                      | <10 <sup>-4</sup> | <10 <sup>-4</sup> | <10 <sup>-4</sup> |
| CsChrimson, ATR-           |                      |                   |                   |                   |
| <b>Figure 1D</b>           |                      |                   |                   |                   |
| Paired                     | DANi1><br>CsChrimson | <10 <sup>-4</sup> | <10 <sup>-4</sup> | <10 <sup>-4</sup> |
| Offset After               | DANi1><br>CsChrimson | <10 <sup>-4</sup> | <10 <sup>-4</sup> | <10 <sup>-4</sup> |
| Reverse Paired             | DANi1><br>CsChrimson | 0.2689            | 0.6166            | 0.9379            |
| Offset Before              | DANi1><br>CsChrimson | 0.4373            | 0.9479            | 0.9770            |
| Paired, ATR-               | DANi1><br>CsChrimson | 0.4315            | 1.000             | 0.2658            |
| No Training                | DANi1><br>CsChrimson | 0.3664            | 0.7726            | 0.9835            |
| DAN w/o CO <sub>2</sub>    | DANi1><br>CsChrimson | 0.3102            | 0.7173            | 0.4852            |
| Driver ctrl                | SS00864              | 0.0313            | 0.3411            | 0.3977            |
| Effector ctrl              | UAS-CsChrimson       | 0.2361            | 0.6336            | 0.8366            |
| 58E02>                     | 58E02><br>CsChrimson | <10 <sup>-4</sup> | <10 <sup>-4</sup> | <10 <sup>-4</sup> |
| <b>Figure 1E</b>           |                      |                   |                   |                   |
| Paired                     | DANi1><br>CsChrimson | <10 <sup>-4</sup> | <10 <sup>-4</sup> | <10 <sup>-4</sup> |
| Reverse Paired             |                      | 0.163             | 0.6801            | 0.1939            |
| Btw CO <sub>2</sub>        |                      | 0.0001            | 0.006543          | 0.0003257         |
| <b>Figure 1F</b>           |                      |                   |                   |                   |
| 6.5%                       | DANi1><br>CsChrimson | <10 <sup>-4</sup> | <10 <sup>-4</sup> | <10 <sup>-4</sup> |
| 8%                         |                      | <10 <sup>-4</sup> | <10 <sup>-4</sup> | <10 <sup>-4</sup> |
| 15%                        |                      | <10 <sup>-4</sup> | <10 <sup>-4</sup> | <10 <sup>-4</sup> |
| 18%                        |                      | <10 <sup>-4</sup> | <10 <sup>-4</sup> | <10 <sup>-4</sup> |
| <b>Figure 2A</b>           |                      |                   |                   |                   |
| 0 Cycles                   | DANi1><br>CsChrimson | 0.3647            | 0.7726            | 0.9835            |
| 1 Cycles                   |                      | <10 <sup>-4</sup> | <10 <sup>-4</sup> | 0.0591            |
| 2 Cycles                   |                      | <10 <sup>-4</sup> | <10 <sup>-4</sup> | <10 <sup>-4</sup> |
| 3 Cycles                   |                      | <10 <sup>-4</sup> | <10 <sup>-4</sup> | <10 <sup>-4</sup> |
| 4 Cycles                   |                      | <10 <sup>-4</sup> | <10 <sup>-4</sup> | <10 <sup>-4</sup> |
| 5 Cycles                   |                      | <10 <sup>-4</sup> | <10 <sup>-4</sup> | <10 <sup>-4</sup> |
| 10 Cycles                  |                      | <10 <sup>-4</sup> | <10 <sup>-4</sup> | <10 <sup>-4</sup> |
| 20 Cycles                  |                      | <10 <sup>-4</sup> | <10 <sup>-4</sup> | <10 <sup>-4</sup> |

| <b>Figure 3B</b>                              | DAN1><br>CsChrimson |                   |                   |                   |
|-----------------------------------------------|---------------------|-------------------|-------------------|-------------------|
| 2 Cycles, Training                            |                     | <10 <sup>-4</sup> | <10 <sup>-4</sup> | 0.001074          |
| 2 Cycles, Habituation + Training              |                     | <10 <sup>-4</sup> | <10 <sup>-4</sup> | <10 <sup>-4</sup> |
| 2 Cycles, Training + Ex-tinction              |                     | 0.0020            | 0.001339          | 0.04743           |
| 3 Cycles, Training                            |                     | <10 <sup>-4</sup> | <10 <sup>-4</sup> | <10 <sup>-4</sup> |
| 3 Cycles, Habituation + Training              |                     | <10 <sup>-4</sup> | <10 <sup>-4</sup> | 0.0007459         |
| 3 Cycles, Training + Ex-tinction              |                     | 0.0176            | 0.1763            | 0.03069           |
| 4 Cycles, Training                            |                     | <10 <sup>-4</sup> | <10 <sup>-4</sup> | <10 <sup>-4</sup> |
| 4 Cycles, Habituation + Training              |                     | <10 <sup>-4</sup> | <10 <sup>-4</sup> | <10 <sup>-4</sup> |
| 4 Cycles, Training + Ex-tinction              |                     | <10 <sup>-4</sup> | <10 <sup>-4</sup> | <10 <sup>-4</sup> |
| 5 Cycles, Training                            |                     | <10 <sup>-4</sup> | <10 <sup>-4</sup> | <10 <sup>-4</sup> |
| 6 Cycles, Habituation + Training              |                     | <10 <sup>-4</sup> | <10 <sup>-4</sup> | <10 <sup>-4</sup> |
| 6 Cycles, Training + Ex-tinction              |                     | <10 <sup>-4</sup> | <10 <sup>-4</sup> | <10 <sup>-4</sup> |
| 10 Cycles, Training                           |                     | <10 <sup>-4</sup> | <10 <sup>-4</sup> | <10 <sup>-4</sup> |
| 10 Cycles, Habituation + Training             |                     | <10 <sup>-4</sup> | <10 <sup>-4</sup> | <10 <sup>-4</sup> |
| 10 Cycles, Training + Extinction              |                     | <10 <sup>-4</sup> | <10 <sup>-4</sup> | <10 <sup>-4</sup> |
| <b>Figure 4B</b>                              | DAN1><br>CsChrimson |                   |                   |                   |
| 20x<br>Pre-Test/Post-Test                     |                     | <10 <sup>-4</sup> | <10 <sup>-4</sup> | <10 <sup>-4</sup> |
| 20x<br>Pre-Test/Next Day                      |                     | <10 <sup>-4</sup> | <10 <sup>-4</sup> | <10 <sup>-4</sup> |
| 20x (Only Test Next Day)<br>Pre-Test/Next Day |                     | <10 <sup>-4</sup> | <10 <sup>-4</sup> | <10 <sup>-4</sup> |
| 5x<br>Pre-Test/Post-Test                      |                     | <10 <sup>-4</sup> | <10 <sup>-4</sup> | <10 <sup>-4</sup> |
| 5x<br>Pre-Test/Next Day                       |                     | <10 <sup>-4</sup> | <10 <sup>-4</sup> | <10 <sup>-4</sup> |
| 2x<br>Pre-Test/Post-Test                      |                     | <10 <sup>-4</sup> | <10 <sup>-4</sup> | <10 <sup>-4</sup> |
| 2x<br>Pre-Test/Next Day                       |                     | 0.0501            | 0.3524            | 0.07216           |
| 2x (Only Test Next Day)<br>Pre-Test/Next Day  |                     | <10 <sup>-4</sup> | <10 <sup>-4</sup> | <10 <sup>-4</sup> |
| No Train<br>Pre-Test/Post-Test                |                     | 0.3319            | 0.7893            | 0.2003            |
| No Train<br>Pre-Test/Next Day                 |                     | 0.0530            | 0.3071            | 0.8884            |

|                                            |                     |            |            |
|--------------------------------------------|---------------------|------------|------------|
| RP 20x<br>Pre-Test/Post-Test               | 0.1507              | 0.4276     | 0.7396     |
| RP 20x<br>Pre-Test/Next Day                | 0.3481              | 0.8474     | 0.3765     |
| Ext Post-Train<br>Pre-Test/Next Day        | 0.0146              | 0.3315     | 0.01336    |
| Ext Pre-Test<br>Pre-Test/Next Day          | $<10^{-4}$          | $<10^{-4}$ | $<10^{-4}$ |
| <b>Figure 4C</b>                           | DAN1><br>CsChrimson |            |            |
| M 20x<br>(CXM+/ATR+)<br>Pre-Test/Post-Test | $<10^{-4}$          | $<10^{-4}$ | $<10^{-4}$ |
| M 20x<br>(CXM+/ATR+)<br>Pre-Test/Next Day  | $<10^{-4}$          | $<10^{-4}$ | $<10^{-4}$ |
| M 20x<br>(CXM-/ATR+)<br>Pre-Test/Post-Test | $<10^{-4}$          | $<10^{-4}$ | $<10^{-4}$ |
| M 20x<br>(CXM-/ATR+)<br>Pre-Test/Next Day  | $<10^{-4}$          | $<10^{-4}$ | $<10^{-4}$ |
| S 10x<br>(CXM+/ATR+)<br>Pre-Test/Next Day  | 0.014               | 0.1671     | 0.02985    |
| S 10x<br>(CXM-/ATR+)<br>Pre-Test/Next Day  | $<10^{-4}$          | $<10^{-4}$ | $<10^{-4}$ |
| M 10x<br>(CXM+/ATR+)<br>Pre-Test/Next Day  | $<10^{-4}$          | $<10^{-4}$ | $<10^{-4}$ |
| M 10x<br>(CXM-/ATR+)<br>Pre-Test/Next Day  | $<10^{-4}$          | $<10^{-4}$ | $<10^{-4}$ |

| Model Name                              | Formula                                                                                                                                                                                                                                                                                                                                                                                                                                        | # params | $\Delta \log(P)$ | $\Delta \text{AIC}$ | $\Delta \text{BIC}$ |
|-----------------------------------------|------------------------------------------------------------------------------------------------------------------------------------------------------------------------------------------------------------------------------------------------------------------------------------------------------------------------------------------------------------------------------------------------------------------------------------------------|----------|------------------|---------------------|---------------------|
| Shifting Mean (fixed $\tilde{\sigma}$ ) | $P \propto \prod_{n_c \in (0,1,2,3,4,5,10,20)} \prod_j \mathcal{N} \left( p(n_c, j), \mu(n_c), \tilde{\sigma} \sqrt{\frac{\mu(n_c) * (1 - \mu(n_c))}{n(n_c, j)}} \right)$                                                                                                                                                                                                                                                                      | 9        | -42.7            | 84.86               | 104.45              |
| Shifting Mean and $\tilde{\sigma}$      | $P \propto \prod_{n_c \in (0,1,2,3,4,5,10,20)} \prod_j \mathcal{N} \left( p(n_c, j), \mu(n_c), \frac{\tilde{\sigma}(n_c)}{\sqrt{n(n_c, j)}} \right)$                                                                                                                                                                                                                                                                                           | 16       | -12.9            | 39.3                | 86.3                |
| Shifting Fraction                       | $P \propto \prod_{n_c \in (0,1,2,3,4,5,10,20)} \prod_j f_u(n_c) \mathcal{N} \left( p(n_c, j), \mu_u, \tilde{\sigma} \sqrt{\frac{\mu_u * (1 - \mu_u)}{n(n_c, j)}} \right) + \dots (1 - f_u(n_c)) \mathcal{N} \left( p(n_c, j), \mu_t, \tilde{\sigma} \sqrt{\frac{\mu_t * (1 - \mu_t)}{n(n_c, j)}} \right)$                                                                                                                                      | 11       | -3.93            | 11.3                | 38.7                |
| Shifting Fraction<br>(3 clusters)       | $P \propto \prod_{n_c \in (0,1,2,3,4,5,10,20)} \prod_j f_1(n_c) \mathcal{N} \left( p(n_c, j), \mu_1, \tilde{\sigma} \sqrt{\frac{\mu_1 * (1 - \mu_1)}{n(n_c, j)}} \right) + \dots f_2(n_c) \mathcal{N} \left( p(n_c, j), \mu_2, \tilde{\sigma} \sqrt{\frac{\mu_2 * (1 - \mu_2)}{n(n_c, j)}} \right) + \dots (1 - f_1(n_c) - f_2(n_c)) \mathcal{N} \left( p(n_c, j), \mu_3, \tilde{\sigma} \sqrt{\frac{\mu_3 * (1 - \mu_3)}{n(n_c, j)}} \right)$ | 20       | 0                | 21.4                | 84.1                |
| Exponential Fraction                    | $P \propto \prod_{n_c \in (0,1,2,3,4,5,10,20)} \prod_j \lambda^{n_c} \mathcal{N} \left( p(n_c, j), \mu_u, \tilde{\sigma} \sqrt{\frac{\mu_u * (1 - \mu_u)}{n(n_c, j)}} \right) + \dots (1 - \lambda^{n_c}) \mathcal{N} \left( p(n_c, j), \mu_t, \tilde{\sigma} \sqrt{\frac{\mu_t * (1 - \mu_t)}{n(n_c, j)}} \right)$                                                                                                                            | 4        | -5.3             | 0                   | 0                   |

  

| Symbol                        | Definition                                                                                                    | Symbol                | Definition                                                                       |
|-------------------------------|---------------------------------------------------------------------------------------------------------------|-----------------------|----------------------------------------------------------------------------------|
| $n_c$                         | number of training cycles                                                                                     | $p(n_c, j)$           | fraction of times $j^{\text{th}}$ larva chose CO <sub>2</sub> after $n_c$ cycles |
| $\mu(n_c)$                    | mean probability of choosing CO <sub>2</sub> after $n_c$ training cycles                                      | $n(n_c, j)$           | # choices made by $j^{\text{th}}$ larva after $n_c$ training cycles              |
| $\tilde{\sigma}$              | global adjustment to binomial standard deviation                                                              | $\tilde{\sigma}(n_c)$ | training dependent standard deviation                                            |
| $\mu_u$                       | probability of larva in untrained group choosing CO <sub>2</sub>                                              | $\mu_t$               | probability of larva in trained group choosing CO <sub>2</sub>                   |
| $f_u(n_c)$                    | fraction of larvae in untrained group after $n_c$ cycles                                                      | $\mu_1, \mu_2, \mu_3$ | probability of larva in group 1,2,3 choosing CO <sub>2</sub>                     |
| $f_1(n_c), f_2(n_c)$          | fraction of larvae in groups 1,2 after $n_c$ cycles                                                           | $\lambda$             | fraction of larvae not trained after 1 cycle                                     |
| $\mathcal{N}(x, \mu, \sigma)$ | normal cdf: $\frac{1}{\sqrt{2\pi}\sigma} e^{-\frac{(x-\mu)^2}{2\sigma^2}}$                                    | $\Delta \log(P)$      | relative log probability of data given model                                     |
| AIC                           | Aikake Information Criterion: $2k - 2 \log(P)$ , $k = \# \text{ params}$                                      | $\Delta \text{AIC}$   | AIC - lowest AIC                                                                 |
| BIC                           | Bayes Information Criterion: $k \log(n_A) - 2 \log(P)$ , $k = \# \text{ params}$ , $n_A = \# \text{ animals}$ | $\Delta \text{BIC}$   | BIC - lowest BIC                                                                 |

**Table S3:** Model fits to data in Figure 2. Shifting Mean and  $\tilde{\sigma}$ , shifting fraction, and exponential fraction models are presented in Figure 2. Model name: name of the model. Formula: expression for the probability of the data given the model and its parameters. # params: number of free parameters in the model.  $\Delta \log(P)$  logarithm of the probability of the data given best fit to this model minus logarithm of the probability of the data given the best fit model overall.  $\Delta \text{AIC}$ ,  $\Delta \text{BIC}$  - Aikake and Bayes Information Criterion minus the lowest values over the models tested. Lower numbers indicate model is favored. According to both criterion, the exponential fraction model is strongly favored over the shifting fraction model, and the shifting fraction model is strongly favored over all models except the exponential fractional model.
